# Supplementary material for: Meta-Analysis of Interactions between Arbuscular Mycorrhizal Fungi and Biotic Stressors of Plants
Source: Hindawi journal article supplement (doi:10.1155/2014/746506), 2014-01-01
Supplement: f1 [file 746506.f1.pdf]

1. Abdalla ME, Abdel-Fattah GM (2000) Influence of the endomycorrhizal fungus *Glomus mosseae* on the development of peanut pod rot disease in Egypt. *Mycorrhiza* 10: 29-35
2. Akhtar MS, Siddiqui ZA (2007) Biocontrol of a chickpea root-rot disease complex with *Glomus intraradices*, *Pseudomonas putida* and *Paenibacillus polymyxa*. *Australasian Plant Pathology* 36: 175-180
3. Akhtar MS, Siddiqui ZA (2008) Biocontrol of a root-rot disease complex of chickpea by *Glomus intraradices*, *Rhizobium* sp and *Pseudomonas straita*. *Crop Protection* 27: 410-417
4. Akhtar MS, Siddiqui ZA (2008) *Glomus intraradices*, *Pseudomonas alcaligenes*, and *Bacillus pumilus*: effective agents for the control of root-rot disease complex of chickpea (*Cicer arietinum* L.). *Journal of General Plant Pathology* 74: 53-60
5. Akkopru A, Demir S (2005) Biological control of *Fusarium* wilt in tomato caused by *Fusarium oxysporum* f. sp *lycopersici* by AMF *Glomus intraradices* and some rhizobacteria. *Journal of Phytopathology* 153: 544-550
6. Alraddad AM (1995) Interaction of *Glomus mosseae* and *Paecilomyces lilacinus* on *Meloidogyne javanica* of tomato. *Mycorrhiza* 5: 233-236
7. Anjos ÉCT, Cavalcante UMT, Gonçalves DMC, Pedrosa EMR, Santos VF, Maia LC (2010) Interactions between an arbuscular mycorrhizal fungus (*Scutellospora heterogama*) and the root-knot nematode (*Meloidogyne incognita*) on sweet passion fruit (*Passiflora alata*). *Brazilian Archives of Biology and Technology* 53: 801-809
8. Atilano RA, Menge JA, Vangundy SD (1981) Interaction between *Meloidogyne arenaria* and *Glomus fasciculatus* in grape. *Journal of Nematology* 13: 52-57
9. Attia M, Hamed HA, Turkey AS (2004) Influence of root colonization with *Bacillus subtilis*, *Trichoderma harzianum* and arbuscular mycorrhizae on promoting tomato seedling, yield and protection against *Fusarium* crown and root rot. *Bulletin of the National Research Centre (Cairo)* 29: 347-360
10. Azcón R, Barea JM (1997) Mycorrhizal dependency of a representative plant species in Mediterranean shrublands (*Lavandula spica* L.) as a key factor to its use for revegetation strategies in desertification-threatened areas. *Applied Soil Ecology* 7: 83-92
11. Bagyaraj D, Manjunath A, Reddy DDR (1979) Interaction of vesicular arbuscular mycorrhiza with root knot nematodes in tomato. *Plant and Soil* 51: 397-403
12. Basu MJ, Santhaguru K (2009) Impact of *Glomus fasciculatum* and fluorescent *Pseudomonas* on growth performance of *Vigna radiata* (L.) wilczek challenged with phytopathogens. *Journal of Plant Protection Research* 49: 190-194
13. Behn O (2008) Influence of *Pseudomonas fluorescens* and arbuscular mycorrhiza on the growth, yield, quality and resistance of wheat infected with *Gaeumannomyces graminis*. *Journal of Plant Diseases and Protection* 115: 4-8
14. Bennett AE, Bever JD (2007) Mycorrhizal species differentially alter plant growth and response to herbivory. *Ecology* 88: 210-218
15. Bennett AE, Bever JD (2009) Trade-offs between arbuscular mycorrhizal fungal competitive ability and host growth promotion in *Plantago lanceolata*. *Oecologia* 160: 807-816
16. Berta G, Sampo S, Gamalero E, Massa N, Lemanceau P (2005) Suppression of *Rhizoctonia* root-rot of tomato by *Glomus mossae* BEG12 and *Pseudomonas fluorescens* A6RI is associated with their effect on the pathogen growth and on the root morphogenesis. *European Journal of Plant Pathology* 111: 279-288

17. Bobby VU, Bagyaraj DJ (2003) Biological control of root-rot of *Coleus forskohlii* Briq. using microbial inoculants. *World Journal of Microbiology & Biotechnology* 19: 175-180
18. Borowicz VA (1997) A fungal root symbiont modifies plant resistance to an insect herbivore. *Oecologia* 112: 534-542
19. Calvet C, Pera J, Barea JM (1993) Growth-response of marigold (*Tagetes erecta* L.) to inoculation with *Glomus mosseae*, *Trichoderma aureoviride* and *Pythium-ultimum* in a peat perlite mixture. *Plant and Soil* 148: 1-6
20. Calvet C, Pinochet J, Camprubi A, Fernandez C (1995) Increased tolerance to the root-lesion nematode *Pratylenchus-vulnus* in mycorrhizal micropropagated ba-29 quince rootstock. *Mycorrhiza* 5: 253-258
21. Camprubi A, Pinochet J, Calvet C, Estaun V (1993) Effects of the root-lesion nematode *Pratylenchus vulnus* and the vesicular-arbuscular mycorrhizal fungus *Glomus mosseae* on the growth of three plum rootstocks. *Plant and Soil* 153: 223-229
22. Carling D, Roncadori R, Hussey R (1989) Interactions of vesicular-arbuscular mycorrhizal fungi, root-knot nematode, and phosphorus fertilization on soybean. *Plant Disease* 73: 730-733
23. Carling D, Roncadori R, Hussey R (1995) Interactions of arbuscular mycorrhizae, *Meloidogyne arenaria*, and phosphorus fertilization on peanut. *Mycorrhiza* 6: 9-13
24. Castellanos-Morales V, Keiser C, Cardenas-Navarro R, Grausgruber H, Glauning J, Garcia-Garrido JM, Steinkellner S, Sampedro I, Hage-Ahmed K, Illana A, Ocampo JA, Vierheilig H (2011) The bioprotective effect of AM root colonization against the soil-borne fungal pathogen *Gaeumannomyces graminis* var. *tritici* in barley depends on the barley variety. *Soil Biology & Biochemistry* 43: 831-834
25. Castillo P, Nico AI, Azcon-Aguilar C, Rincon CDR, Calvet C, Jimenez-Diaz RM (2006) Protection of olive planting stocks against parasitism of root-knot nematodes by arbuscular mycorrhizal fungi. *Plant Pathology* 55: 705-713
26. Chakraborty MR, Ghosh I, Ojha S, Dutta S, Chatterjee NC (2008) Synergic effects of VAM and polyphenoloxidases on increased productivity of brinjal and tomato in relation to resistance against Fusarial wilt. *Acta Phytopathologica et Entomologica Hungarica* 43: 37-44
27. Chandanie W, Kubota M, Hyakumachi M (2009) Interactions between the arbuscular mycorrhizal fungus *Glomus mosseae* and plant growth-promoting fungi and their significance for enhancing plant growth and suppressing damping-off of cucumber (*Cucumis sativus* L.). *Applied Soil Ecology* 41: 336-341
28. Chandanie WA, Kubota M, Hyakumachi M (2006) Interactions between plant growth promoting fungi and arbuscular mycorrhizal fungus *Glomus mosseae* and induction of systemic resistance to anthracnose disease in cucumber. *Plant and Soil* 286: 209-217
29. Cimen I, Pirinc V, Sagir A, Akpinar C, Guzel S (2009) Effects of solarization and vesicular arbuscular mycorrhizal fungus (VAM) on phytophthora blight (*Phytophthora capsici* Leonian) and yield in pepper. *African Journal of Biotechnology* 8: 4884-4894
30. Cordier C, Gianinazzi S, Gianinazzi-Pearson V (1996) Colonisation patterns of root tissues by *Phytophthora nicotianae* var. *parasitica* related to reduced disease in mycorrhizal tomato. *Plant and Soil* 185: 223-232
31. Currie AF, Murray PJ, Gange AC (2011) Is a specialist root-feeding insect affected by arbuscular mycorrhizal fungi? *Applied Soil Ecology* 47: 77-83

32. D'Amelio R, Berta G, Gamalero E, Massa N, Avidano L, Cantamessa S, D'Agostino G, Bosco D, Marzachi C (2011) Increased plant tolerance against chrysanthemum yellows phytoplasma ('Candidatus *Phytoplasma asteris*') following double inoculation with *Glomus mosseae* BEG12 and *Pseudomonas putida* S1Pf1Rif. *Plant Pathology* 60: 1014-1022
33. Dar GH, Zargar MY, Beigh GM (1997) Biocontrol of *Fusarium* root rot in the common bean (*Phaseolus vulgaris* L) by using symbiotic *Glomus mosseae* and *Rhizobium leguminosarum*. *Microbial Ecology* 34: 74-80
34. Davis R, Menge J (1980) Influence of *Glomus fasciculatus* and soil phosphorus on *Phytophthora* root rot of citrus. *Phytopathology* 70: 447-452
35. Davis R, Menge J (1981) *Phytophthora parasitica* inoculation and intensity of vesicular-arbuscular mycorrhizae in citrus. *New Phytologist*: 705-715
36. Davis R, Menge J, Erwin D (1979) Influence of *Glomus fasciculatus* and soil phosphorus on *Verticillium* wilt of cotton. *Phytopathology* 69: 453-456
37. Declerck S, Risede JM, Rufyikiri G, Delvaux B (2002) Effects of arbuscular mycorrhizal fungi on severity of root rot of bananas caused by *Cylindrocladium spathiphylli*. *Plant Pathology* 51: 109-115
38. del Carmen Jaizme-Vega M, Rodriguez-Romero AS, Barroso Nunez LA (2006) Effect of the combined inoculation of arbuscular mycorrhizal fungi and plant growth-promoting rhizobacteria on papaya (*Carica papaya* L.) infected with the root-knot nematode *Meloidogyne incognita*. *Fruits* 61: 151-162
39. Deliopoulos T, Minnis ST, Jones PW, Haydock PPJ (2010) Enhancement of the efficacy of a carbamate nematicide against the potato cyst nematode, *Globodera pallida*, through mycorrhization in commercial potato fields. *Journal of Nematology* 42: 22-32
40. Diedhiou PM, Hallmann J, Oerke EC, Dehne HW (2003) Effects of arbuscular mycorrhizal fungi and a non-pathogenic *Fusarium oxysporum* on *Meloidogyne incognita* infestation of tomato. *Mycorrhiza* 13: 199-204
41. Elsen A, Baimey H, Sweenen R, De Waele D (2003) Relative mycorrhizal dependency and mycorrhiza-nematode interaction in banana cultivars (*Musa* spp.) differing in nematode susceptibility. *Plant and Soil* 256: 303-313
42. Elsen A, Beeterens R, Swennen R, De Waele D (2003) Effects of an arbuscular mycorrhizal fungus and two plant-parasitic nematodes on *Musa* genotypes differing in root morphology. *Biology and Fertility of Soils* 38: 367-376
43. Elsen A, Gervacio D, Swennen R, De Waele D (2008) AMF-induced biocontrol against plant parasitic nematodes in *Musa* sp.: a systemic effect. *Mycorrhiza* 18: 251-256
44. Filion M, St-Arnaud M, Jabaji-Hare SH (2003) Quantification of *Fusarium solani* f. sp *phaseoli* in mycorrhizal bean plants and surrounding mycorrhizosphere soil using real-time polymerase chain reaction and direct isolations on selective media. *Phytopathology* 93: 229-235
45. Forge T, Muehlchen A, Hackenberg C, Neilsen G, Vrain T (2001) Effects of preplant inoculation of apple (*Malus domestica* Borkh.) with arbuscular mycorrhizal fungi on population growth of the root-lesion nematode, *Pratylenchus penetrans*. *Plant and Soil* 236: 185-196
46. Fritz M, Jakobsen I, Lyngkjaer MF, Thordal-Christensen H, Pons-Kuehnemann J (2006) Arbuscular mycorrhiza reduces susceptibility of tomato to *Alternaria solani*. *Mycorrhiza* 16:

47. Gallou A, Lucero Mosquera HP, Cranenbrouck S, Pablo Suarez J, Declerck S (2011) Mycorrhiza induced resistance in potato plantlets challenged by *Phytophthora infestans*. *Physiological and Molecular Plant Pathology* 76: 20-26
48. Gange A, Brown V, Sinclair G (1994) Reduction of black vine weevil larval growth by vesicular-arbuscular mycorrhizal infection. *Entomologia Experimentalis et Applicata* 70: 115-119
49. Gange AC (2001) Species-specific responses of a root- and shoot-feeding insect to arbuscular mycorrhizal colonization of its host plant. *New Phytologist* 150: 611-618
50. Gange AC, Bower E, Brown VK (1999) Positive effects of an arbuscular mycorrhizal fungus on aphid life history traits. *Oecologia* 120: 123-131
51. Gange AC, Brown VK, Aplin DM (2003) Multitrophic links between arbuscular mycorrhizal fungi and insect parasitoids. *Ecology Letters* 6: 1051-1055
52. Gange AC, Brown VK, Aplin DM (2005) Ecological specificity of arbuscular mycorrhizae: evidence from foliar-and seed-feeding insects. *Ecology* 86: 603-611
53. Garmendia I, Goicoechea N, Aguirreolea J (2004) Antioxidant metabolism in asymptomatic leaves of *Verticillium*-infected pepper associated with an arbuscular mycorrhizal fungus. *Journal of Phytopathology* 152: 593-599
54. Garmendia I, Goicoechea N, Aguirreolea J (2004) Effectiveness of three *Glomus* species in protecting pepper (*Capsicum annuum* L.) against *verticillium* wilt. *Biological Control* 31: 296-305
55. Gernns H, Alten H, Poehling HM (2001) Arbuscular mycorrhiza increased the activity of a biotrophic leaf pathogen-is a compensation possible? *Mycorrhiza* 11: 237-243
56. Goverde M, van der Heijden M, Wiemken A, Sanders I, Erhardt A (2000) Arbuscular mycorrhizal fungi influence life history traits of a lepidopteran herbivore. *Oecologia* 125: 362-369
57. Grandison GS, Cooper KM (1986) Interaction of vesicular-arbuscular mycorrhizae and cultivars of alfalfa susceptible and resistant to *Meloidogyne* hapla. *Journal of nematology* 18: 141
58. Hao ZP, Christie P, Qin L, Wang CX, Li XL (2005) Control of fusarium wilt of cucumber seedlings by inoculation with an arbuscular mycorrhizal fungus. *Journal of Plant Nutrition* 28: 1961-1974
59. Heald CM, Bruton BD, Davis RM (1989) Influence of *Glomus intraradices* and soil-phosphorus on *Meloidogyne incognita* infecting *Cucumis melo*. *Journal of Nematology* 21: 69-73
60. Hempel S, Stein C, Unsicker SB, Renker C, Auge H, Weisser WW, Buscot F (2009) Specific bottom-up effects of arbuscular mycorrhizal fungi across a plant-herbivore-parasitoid system. *Oecologia* 160: 267-277
61. Hoffmann D, Vierheilig H, Riegler P, Schausberger P (2009) Arbuscular mycorrhizal symbiosis increases host plant acceptance and population growth rates of the two-spotted spider mite *Tetranychus urticae*. *Oecologia* 158: 663-671
62. Hu J-L, Lin X-G, Wang J-H, Shen W-S, Wu S, Peng S-P, Mao T-T (2010) Arbuscular Mycorrhizal Fungal Inoculation Enhances Suppression of Cucumber Fusarium Wilt in Greenhouse Soils. *Pedosphere* 20: 586-593

63. Hussey R, Roncadori R (1978) Interaction of *Pratylenchus brachyurus* and *Gigaspora margarita* on cotton. *Journal of nematology* 10: 16
64. Hwang SF, Chakravarty P, Prevost D (1993) Effects of rhizobia, metalaxyl, and VA mycorrhizal fungi on growth, nitrogen-fixation, and development of pythium root-rot of sainfoin. *Plant Disease* 77: 1093-1098
65. Hwang SF, Chang KF, Chakravarty P (1992) Effects of vesicular-arbuscular mycorrhizal fungi on the development of *Verticillium* and *Fusarium* wilts of alfalfa. *Plant Disease* 76: 239-243
66. Jaiti F, Meddich A, El Hadrami I (2007) Effectiveness of arbuscular mycorrhizal fungi in the protection of date palm (*Phoenix dactylifera* L.) against bayoud disease. *Physiological and Molecular Plant Pathology* 71: 166-173
67. Jaizme-Vega M, Tenoury P, Pinochet J, Jaumot M (1997) Interactions between the root-knot nematode *Meloidogyne incognita* and *Glomus mosseae* in banana. *Plant and Soil* 196: 27-35
68. Jaizme-Vega MC, Pinochet J (1997) Growth response of banana to three mycorrhizal fungi in *Pratylenchus goodeyi* infested soil. *Nematropica* 27: 69-76
69. Jalaluddin M, Hajra NB, Firoza K, Shahina F (2008) Effect of *Glomus callosum*, *Meloidogyne incognita* and soil moisture on growth and yield of sunflower. *Pakistan Journal of Botany* 40: 391-396
70. Kasiandari RS, Smith SE, Smith FA, Scott ES (2002) Influence of the mycorrhizal fungus, *Glomus coronatum*, and soil phosphorus on infection and disease caused by binucleate *Rhizoctonia* and *Rhizoctonia solani* on mung bean (*Vigna radiata*). *Plant and Soil* 238: 235-244
71. Khaosaad T, Garcia-Garrido JM, Steinkellner S, Vierheilig H (2007) Take-all disease is systemically reduced in roots of mycorrhizal barley plants. *Soil Biology & Biochemistry* 39: 727-734
72. Khatun S, Chatterjee NC (2011) *Glomus fasciculatum* in defense responses to fusarial wilt of *Coleus forskohlii*. *Acta Agriculturae Scandinavica Section B-Soil and Plant Science* 61: 136-142
73. Kobra N, Jalil K, Youbert G (2011) Arbuscular mycorrhizal fungi and biological control of *Verticillium*-wilted cotton plants. *Archives of Phytopathology and Plant Protection* 44: 933-942
74. Krishna H, Das B, Attri BL, Grover M, Ahmed N (2010) Suppression of *Botryosphaeria* canker of apple by arbuscular mycorrhizal fungi. *Crop Protection* 29: 1049-1054
75. Larsen J, Ravnskov S, Jakobsen I (2003) Combined effect of an arbuscular mycorrhizal fungus and a biocontrol bacterium against *Pythium ultimum* in soil. *Folia Geobotanica* 38: 145-154
76. Larsen J, Yohalem D (2004) Interactions between mycorrhiza and powdery mildew of cucumber. *Mycological Progress* 3: 123-128
77. Lax P, Becerra AG, Soteras F, Cabello M, Doucet ME (2011) Effect of the arbuscular mycorrhizal fungus *Glomus intraradices* on the false root-knot nematode *Nacobbus aberrans* in tomato plants. *Biology and Fertility of Soils* 47: 591-597
78. Lingua G, D'Agostino G, Massa N, Antosiano M, Berta G (2002) Mycorrhiza-induced differential response to a yellows disease in tomato. *Mycorrhiza* 12: 191-198
79. Liu RJ (1995) Effect of vesicular-arbuscular mycorrhizal fungi on *verticillium* wilt of cotton. *Mycorrhiza* 5: 293-297

80. Liu RJ, Li HF, Shen CY, Chiu WF (1995) Detection of pathogenesis-related proteins in cotton plants. *Physiological and Molecular Plant Pathology* 47: 357-363
81. MacGuidwin A, Bird G, Safir G (1985) Influence of *Glomus fasciculatum* on *Meloidogyne hapla* infecting *Allium cepa*. *Journal of nematology* 17: 389
82. Martinez-Medina A, Pascual JA, Lloret E, Roldan A (2009) Interactions between arbuscular mycorrhizal fungi and *Trichoderma harzianum* and their effects on *Fusarium* wilt in melon plants grown in seedling nurseries. *Journal of the Science of Food and Agriculture* 89: 1843-1850
83. Martínez-Medina A, Roldán A, Pascual JA (2011) Interaction between arbuscular mycorrhizal fungi and *Trichoderma harzianum* under conventional and low input fertilization field condition in melon crops: Growth response and *Fusarium* wilt biocontrol. *Applied Soil Ecology* 47: 98-105
84. Neeraj, Singh K (2010) *Cyamopsis tetragonoloba* L Taub inoculated with arbuscular mycorrhiza and *Pseudomonas fluorescens* and treated with mustard oil cake overcome *Macrophomina* root-rot losses. *Biology and Fertility of Soils* 46: 237-245
85. Neeraj, Singh K (2011) Organic amendments to soil inoculated arbuscular mycorrhizal fungi and *Pseudomonas fluorescens* treatments reduce the development of root-rot disease and enhance the yield of *Phaseolus vulgaris* L. *European Journal of Soil Biology* 47: 288-295
86. Newsham K, Fitter A, Watkinson A (1995) Arbuscular mycorrhiza protect an annual grass from root pathogenic fungi in the field. *Journal of Ecology*: 991-1000
87. Nogales A, Aguirreolea J, Maria ES, Camprubi A, Calvet C (2009) Response of mycorrhizal grapevine to *Armillaria mellea* inoculation: disease development and polyamines. *Plant and Soil* 317: 177-187
88. Nogales A, Camprubi A, Estaun V, Marfa V, Calvet C (2010) In vitro interaction studies between *Glomus intraradices* and *Armillaria mellea* in vines. *Spanish Journal of Agricultural Research* 8: S62-S68
89. Norman JR, Atkinson D, Hooker JE (1996) Arbuscular mycorrhizal fungal-induced alteration to root architecture in strawberry and induced resistance to the root pathogen *Phytophthora fragariae*. *Plant and Soil* 185: 191-198
90. O'Bannon J, Inserra R, Nemec S, Vovlas N (1979) The influence of *Glomus mosseae* on *Tylenchulus semipenetrans*-infected and uninfected *Citrus limon* seedlings. *Journal of nematology* 11: 247
91. O'Bannon J, Nemec S (1979) The response of *Citrus limon* seedlings to a symbiont, *Glomus etunicatus*, and a pathogen, *Radopholus similis*. *Journal of nematology* 11: 270
92. Ozgonen H, Akgul DS, Erkilic A (2010) The effects of arbuscular mycorrhizal fungi on yield and stem rot caused by *Sclerotium rolfsii* Sacc. in peanut. *African Journal of Agricultural Research* 5: 128-132
93. Ozgonen H, Erkilic A (2007) Growth enhancement and *Phytophthora* blight (*Phytophthora capsici* Leonian) control by arbuscular mycorrhizal fungal inoculation in pepper. *Crop Protection* 26: 1682-1688
94. Pandey R (2005) Management of *Meloidogyne incognita* in *Artemisia pallens* with bio-organics. *Phytoparasitica* 33: 304-308
95. Pandey R, Gupta ML, Singh HB, Kumar S (1999) The influence of vesicular-arbuscular mycorrhizal fungi alone or in combination with *Meloidogyne incognita* on *Hyoscyamus niger*

- L. Bioresource Technology 69: 275-278
96. Pandey R, Kalra A, Gupta ML (2009) Evaluation of bio-agents and pesticide on root-knot nematode development and oil yield of patchouli. Archives of Phytopathology and Plant Protection 42: 419-423
  97. Petit E, Gubler WD (2006) Influence of *Glomus intraradices* on black foot disease caused by *Cylindrocarpon macrodidymum* on *Vitis rupestris* under controlled conditions. Plant Disease 90: 1481-1484
  98. Pinochet J, Calvet C, Camprubi A, Fernandez C (1995) Growth and nutritional response of nemared peach rootstock infected with *Pratylenchus vulnus* and the mycorrhizal fungus *Glomus mosseae*. Fundamental and Applied Nematology 18: 205-210
  99. Pinochet J, Calvet C, Camprubi A, Fernandez C (1995) Interaction between the root-lesion nematode *Pratylenchus vulnus* and the mycorrhizal association of *Glomus intraradices* and Santa Lucia 64 cherry rootstock. Plant and Soil 170: 323-329
  100. Pinochet J, Camprubi A, Calvet C (1993) Effects of the root-lesion nematode *Pratylenchus vulnus* and the mycorrhizal fungus *Glomus mosseae* on the growth of emla-26 apple rootstock. Mycorrhiza 4: 79-83
  101. Pinochet J, Camprubi A, Calvet C, Fernandez C, Kabana RR (1998) Inducing tolerance to the root-lesion nematode *Pratylenchus vulnus* by early mycorrhizal inoculation of micropropagated myrobalan 29 C plum rootstock. Journal of the American Society for Horticultural Science 1223: 342-347
  102. Pinochet J, Fernández C, de Carmen Jaizme M, Tenoury P (1997) Micropropagated banana infected with *Meloidogyne javanica* responds to *Glomus intraradices* and phosphorus. HortScience 32: 101-103
  103. Rabie GH (1998) Induction of fungal disease resistance in *Vicia faba* by dual inoculation with *Rhizobium leguminosarum* and vesicular-arbuscular mycorrhizal fungi. Mycopathologia 141: 159-166
  104. Ren L, Lou Y, Sakamoto K, Inubushi K, Amemiya Y, Shen Q, Xu G (2010) Effects of Arbuscular Mycorrhizal Colonization on Microbial Community in Rhizosphere Soil and Fusarium Wilt Disease in Tomato. Communications in Soil Science and Plant Analysis 41: 1399-1410
  105. Roncadori R, Hussey R (1977) Interaction of the endomycorrhizal fungus *Gigaspora margarita* and root-knot nematode on cotton. Phytopathology 67: 1507-1511
  106. Sankaranarayanan C, Sundarababu R (2010) Influence of application methods of arbuscular mycorrhiza *Glomus mosseae* in the bio-management of root knot nematode, *Meloidogyne incognita* on black gram (*Vigna mungo* L.) Hepper. Journal of Biological Control 24: 51-57
  107. Siddiqui ZA, Akhtar MS (2007) Effects of AM fungi and organic fertilizers on the reproduction of the nematode *Meloidogyne incognita* and on the growth and water loss of tomato. Biology and Fertility of Soils 43: 603-609
  108. Siddiqui ZA, Akhtar MS (2007) Biocontrol of a chickpea root-rot disease complex with phosphate-solubilizing microorganisms. Journal of Plant Pathology 89: 67-77
  109. Siddiqui ZA, Akhtar MS (2008) Effects of fertilizers, AM fungus and plant growth promoting rhizobacterium on the growth of tomato and on the reproduction of root-knot nematode *Meloidogyne incognita*. Journal of Plant Interactions 3: 263-271
  110. Siddiqui ZA, Akhtar MS (2009) Effects of antagonistic fungi, plant growth-promoting

- rhizobacteria, and arbuscular mycorrhizal fungi alone and in combination on the reproduction of *Meloidogyne incognita* and growth of tomato. *Journal of General Plant Pathology* 75: 144-153
111. Siddiqui ZA, Mahmood I (1995) Biological-control of *Heterodera cajani* and *Fusarium udum* by *Bacillus subtilis*, *Bradyrhizobium japonicum* and *Glomus fasciculatum* on pigeonpea. *Fundamental and Applied Nematology* 18: 559-566
  112. Siddiqui ZA, Mahmood I (1995) Some observations on the management of the wilt disease complex of pigeonpea by treatment with a vesicular arbuscular fungus and biocontrol agents for nematodes. *Bioresource technology* 54: 227-230
  113. Siddiqui ZA, Mahmood I (1998) Effect of a plant growth promoting bacterium, an AM fungus and soil types on the morphometrics and reproduction of *Meloidogyne javanica* on tomato. *Applied Soil Ecology* 8: 77-84
  114. Siddiqui ZA, Mahmood T (2001) Effects of rhizobacteria and root symbionts on the reproduction of *Meloidogyne javanica* and growth of chickpea. *Bioresource Technology* 79: 41-45
  115. Sikes BA, Cottenie K, Klironomos JN (2009) Plant and fungal identity determines pathogen protection of plant roots by arbuscular mycorrhizas. *Journal of Ecology* 97: 1274-1280
  116. Singh R, Parameswaran TN, Rao EVSP, Puttanna K, Kalra A, Srinivas KVNS, Bagyaraj DJ, Divya S (2009) Effect of arbuscular mycorrhizal fungi and *Pseudomonas fluorescens* on root-rot and wilt, growth and yield of *Coleus forskohlii*. *Biocontrol Science and Technology* 19: 835-841
  117. Smith G, Kaplan D (1988) Influence of mycorrhizal fungus, phosphorus, and burrowing nematode interactions on growth of rough lemon citrus seedlings. *Journal of nematology* 20: 539
  118. Smith G, Roncadori R, Hussey R (1986) Interaction of endomycorrhizal fungi, superphosphate, and *Meloidogyne incognita* on cotton in microplot and field studies. *Journal of nematology* 18: 208
  119. Song YY, Cao M, Xie LJ, Liang XT, Zeng RS, Su YJ, Huang JH, Wang RL, Luo SM (2011) Induction of DIMBOA accumulation and systemic defense responses as a mechanism of enhanced resistance of mycorrhizal corn (*Zea mays* L.) to sheath blight. *Mycorrhiza* 21: 721-731
  120. Srivastava R, Khalid A, Singh US, Sharma AK (2010) Evaluation of arbuscular mycorrhizal fungus, fluorescent *Pseudomonas* and *Trichoderma harzianum* formulation against *Fusarium oxysporum* f. sp. *lycopersici* for the management of tomato wilt. *Biological Control* 53: 24-31
  121. Steinkellner S, Hage-Ahmed K, García-Garrido JM, Illana A, Ocampo JA, Vierheilig H (2011) A comparison of wild-type, old and modern tomato cultivars in the interaction with the arbuscular mycorrhizal fungus *Glomus mosseae* and the tomato pathogen *Fusarium oxysporum* f. sp. *lycopersici*. *Mycorrhiza*: 1-6
  122. Strobel N, Hussey R, Roncadori R (1982) Interactions of Vesicular-Arbuscular Mycorrhizal Fungi, *Meloidogyne incognita*, and Soil Fertility on Peach. *Phytopathology* 72: 690-694
  123. Subhashini DV, Padmaja K (2010) Interaction between arbuscular mycorrhizal fungi and *Pythium aphanidermatum* in tobacco seedbeds. *Journal of Biological Control* 24: 70-74
  124. Sukhada M, Manjula R, Rawal RD (2011) Evaluation of arbuscular mycorrhiza and other biocontrol agents against *Phytophthora parasitica* var. *nicotianae* infecting papaya (*Carica*



- papaya cv. Surya) and enumeration of pathogen population using immunotechniques. *Biological Control* 58: 22-29
125. Sundaresan P, Raja NU, Gunasekaran P (1993) Induction and accumulation of phytoalexins in cowpea roots infected with a mycorrhizal fungus *Glomus fasciculatum* and their resistance to *Fusarium* wilt disease. *Journal of biosciences* 18: 291-301
  126. Tabin T, Arunachalam A, Shrivastava K, Arunachalam K (2009) Effect of arbuscular mycorrhizal fungi on damping-off disease in *Aquilaria agallocha* Roxb. seedlings. *Tropical Ecology* 50: 243-248
  127. Talavera M, Ito K, Mizukubo T (2001) Reduction of nematode damage by root colonization with arbuscular mycorrhiza (*Glomus* spp.) in tomato-*Meloidogyne incognita* (Tylenchida : Meloidognidae) and carrot-*Pratylenchus penetrans* (Tylenchida : Pratylenchidae) pathosystems. *Applied Entomology and Zoology* 36: 387-392
  128. Talavera M, Ito K, Mizukubo T (2002) Combined application of *Glomus* sp and *Pasteuria penetrans* for reducing *Meloidogyne incognita* (Tylenchida : Meloidogynidae) populations and improving tomato growth. *Applied Entomology and Zoology* 37: 61-67
  129. Teixeira dos Anjos EC, Tiburcio Cavalcante UM, Correia Goncalves DM, Regis Pedrosa EM, dos Santos VF, Maia LC (2010) Interactions between an Arbuscular Mycorrhizal Fungus (*Scutellospora heterogama*) and the Root-knot Nematode (*Meloidogyne incognita*) on Sweet Passion Fruit (*Passiflora alata*). *Brazilian Archives of Biology and Technology* 53: 801-809
  130. Thygesen K, Larsen J, Bodker L (2004) Arbuscular mycorrhizal fungi reduce development of pea root-rot caused by *Aphanomyces euteiches* using oospores as pathogen inoculum. *European Journal of Plant Pathology* 110: 411-419
  131. Toussaint JP, Kraml M, Nell M, Smith SE, Smith FA, Steinkellner S, Schmiderer C, Vierheilig H, Novak J (2008) Effect of *Glomus mosseae* on concentrations of rosmarinic and caffeic acids and essential oil compounds in basil inoculated with *Fusarium oxysporum* f.sp. *basilici*. *Plant Pathology* 57: 1109-1116
  132. Utkhede R (2006) Increased growth and yield of hydroponically grown greenhouse tomato plants inoculated with arbuscular mycorrhizal fungi and *Fusarium oxysporum* f. *Sp radicis-lycopersici*. *Biocontrol* 51: 393-400
  133. Vaast P, Caswell-Chen EP, Zasoski RJ (1998) Influences of a root-lesion nematode, *Pratylenchus coffeae*, and two arbuscular mycorrhizal fungi, *Acaulospora mellea* and *Glomus clarum* on coffee (*Coffea arabica* L.). *Biology and Fertility of Soils* 26: 130-135
  134. Vicari M, Hatcher P, Ayres P (2002) Combined effect of foliar and mycorrhizal endophytes on an insect herbivore. *Ecology* 83: 2452-2464
  135. Vigo C, Norman JR, Hooker JE (2000) Biocontrol of the pathogen *Phytophthora parasitica* by arbuscular mycorrhizal fungi is a consequence of effects on infection loci. *Plant Pathology* 49: 509-514
  136. Vos C, Geerinckx K, Mkandawire R, Panis B, De Waele D, Elsen A (2012) Arbuscular mycorrhizal fungi affect both penetration and further life stage development of root-knot nematodes in tomato. *Mycorrhiza* 22: 157-163
  137. Waceke JW, Waudu SW, Sikora R (2001) Suppression of *Meloidogyne* hapla by arbuscular mycorrhiza fungi (AMF) on pyrethrum in Kenya. *International Journal of Pest Management* 47: 135-140
  138. Waceke JW, Waudu SW, Sikora R (2002) Effect of inorganic phosphatic fertilizers on the

- efficacy of an arbuscular mycorrhiza fungus against a root-knot nematode on pyrethrum. *International Journal of Pest Management* 48: 307-313
139. Wamberg C, Christensen S, Jakobsen I (2003) Interaction between foliar-feeding insects, mycorrhizal fungi, and rhizosphere protozoa on pea plants. *Pedobiologia* 47: 281-287
  140. Wooley SC, Paine TD (2007) Can intra-specific genetic variation in arbuscular mycorrhizal fungi (*Glomus etunicatum*) affect a mesophyll - feeding herbivore (*Tupiocoris notatus* Distant)? *Ecological Entomology* 32: 428-434
  141. Zambolim L, Schenck N (1983) Reduction of the effects of pathogenic, root-infecting fungi on soybean by the mycorrhizal fungus, *Glomus mosseae*. *Phytopathology* 73: 1402-1405
  142. Zhang L, Zhang J, Christie P, Li X (2008) Pre-inoculation with arbuscular mycorrhizal fungi suppresses root knot nematode (*Meloidogyne incognita*) on cucumber (*Cucumis sativus*). *Biology and Fertility of Soils* 45: 205-211
  143. Zhang L, Zhang J, Christie P, Li X (2009) Effect of Inoculation with the Arbuscular Mycorrhizal Fungus *Glomus Intraradices* on the Root-Knot Nematode *Meloidogyne Incognita* in Cucumber. *Journal of Plant Nutrition* 32: 967-979
  144. Ziedan E-SH, Elewa IS, Mostafa HM, Sahab AF (2011) Application of mycorrhizae for controlling root diseases of sesame. *Journal of Plant Protection Research* 51: 355-361
