# Supplementary material for: Meta-Analysis of Interactions between Arbuscular Mycorrhizal Fungi and Biotic Stressors of Plants
Source: ScientificWorldJournal. 2014 Jan 16;2014:746506. doi: 10.1155/2014/746506 (PMC3914602; doi:10.1155/2014/746506)
Supplement: Supplementary file 2 [file 746506.f2.xls]

## Sheet: Datasets
Table S1 Details of datasets used for this meta-analysis
Sample No.	Pub_1st_author	Pub_year	Journal type	Plant performance										Biotic stressor performance										Mycorrhizal performance										Fungal species	Fungal Phylotype	Plant species	Plant functional type	Plant family	Biotic Type	Biotic stressor species	Feeding sites/modes
				Xc	Sc	CVc	Nc	SEc	Xe	Se	CVc	Ne	SEe	Xc	Sc	CVc	Nc	SE	Xe	Se	CVc	Ne	SE	Xc	Sc	CVc	Nc	SE	Xe	Se	CVc	Ne	SE
1	Bennett	2007	International	37.8032	2.99558	0.0792417	7	1.13222	22.6494	2.99558	0.132259	7	1.13222																					Glomus white	Glomeraceae	Plantago lanceolata	Forb	Plantaginaceae	Herbivore	Junonia coenia	shoot
2	Bennett	2007	International	11.619	3.04245	0.261851	7	1.14994	8.92405	2.99558	0.335676	7	1.13222																					Archeaespora trappei	Non-Glomeraceae	Plantago lanceolata	Forb	Plantaginaceae	Herbivore	Junonia coenia	shoot
3	Bennett	2007	International	1.4972	3.09004	2.06388	7	1.16793	1.20476	3.09004	2.56487	7	1.16793																					Scutellospora calospora	Non-Glomeraceae	Plantago lanceolata	Forb	Plantaginaceae	Herbivore	Junonia coenia	shoot
4	Bennett	2009	International																					52.2537	13.6627			3.8422	54.8148	14.8996			3.41637	Glomus white	Glomeraceae	Plantago lanceolata	Forb	Plantaginaceae	Herbivore	Junonia coenia	shoot
5	Bennett	2009	International																					51.1242	13.3673			2.77701	43.6509	11.8651			2.98932	Archeaespora trappei	Non-Glomeraceae	Plantago lanceolata	Forb	Plantaginaceae	Herbivore	Junonia coenia	shoot
6	Bennett	2009	International																					30.9924	8.10351			4.05815	26.9355	7.32154			4.04966	Scutellospora calospora	Non-Glomeraceae	Plantago lanceolata	Forb	Plantaginaceae	Herbivore	Junonia coenia	shoot
7	Borowicz	1997	International											0.0288294	0.00731185	0.253625	10	0.00231221	0.0389474	0.00365592	0.0938682	10	0.0011561	37.3737	9.05029	0.242156	10	2.86195	42.7609	6.92081	0.161849	10	2.18855	Glomus etunicatum	Non-Glomeraceae	Glycine max	Forb	Fabaceae	Herbivore	Epilachna varivestis	shoot
8	Currie	2011	International	1.47208	0.200652	0.136305	10	0.0634518	1.25635	0.401304	0.319422	10	0.126904	4.64234	0.969457	0.20883	10	0.306569	4.29197	0.969457	0.225877	10	0.306569	30	13.749	0.458301	10	4.34783	42.8261	13.0616	0.304991	10	4.13043	Glomus mosseae	Glomeraceae	Trifolium repens	Forb	Fabaceae	Herbivore	Sitona lepidus	root
9	Currie	2011	International	1.47208	0.200652	0.136305	10	0.0634518	1.37056	0.441435	0.322084	10	0.139594	4.64234	0.969457	0.20883	10	0.306569	4.37956	0.69247	0.158114	10	0.218978	17.6087	13.0616	0.741769	10	4.13043	16.3043	17.1863	1.05409	10	5.43478	Glomus fasiculatum	Glomeraceae	Trifolium repens	Forb	Fabaceae	Herbivore	Sitona lepidus	root
10	Gange	1994	International	5.57304	5.03015	0.902586	10	1.59067	11.4568	2.66302	0.23244	10	0.842121	85.0321	24.9149	0.293006	10	7.87879	39.4611	44.0802	1.11706	10	13.9394											Glomus mosseae	Glomeraceae	Taraxacum officinale	Forb	Asteraceae	Herbivore	Otiorhynchus sulcatus	root
11	Gange	1994	International	4.57847	1.77535	0.38776	10	0.561414	8.30986	2.66302	0.320465	10	0.842121	82.3571	17.2488	0.209439	10	5.45455	50.1194	15.3323	0.305914	10	4.84848											Glomus mosseae	Glomeraceae	Taraxacum officinale	Forb	Asteraceae	Herbivore	Otiorhynchus sulcatus	root
12	Gange	2001	International	0.906977	1.10312	1.21626	10	0.348837	3.97674	1.76499	0.443828	10	0.55814	53.0196	36.7072	0.692333	10	11.6078	16	25.7943	1.61214	10	8.15686	9.83333	9.22331	0.937964	10	2.91667	11.8333	3.68932	0.311774	10	1.16667	Glomus mosseae	Glomeraceae	Fragaria x ananassa	Forb	Rosaceae	Herbivore	Otiorhynchus sulcatus	root
13	Gange	2001	International	0.906977	1.10312	1.21626	10	0.348837	4.04651	1.43406	0.354393	10	0.453488	53.0196	36.7072	0.692333	10	11.6078	11.9216	20.8338	1.74757	10	6.58824	14.9167	9.75036	0.653655	10	3.08333	9.83333	8.16922	0.830768	10	2.58333	Glomus fasiculatum	Glomeraceae	Fragaria x ananassa	Forb	Rosaceae	Herbivore	Otiorhynchus sulcatus	root
14	Gange	1999	International											9.15517	4.41628	0.482381	10	1.39655	20.3276	9.32327	0.458651	10	2.94828											Glomus intraradices	Glomeraceae	Plantago lanceolata	Forb	Plantaginaceae	Herbivore	Myzus ascalonicus	shoot
15	Gange	1999	International											15.8276	7.85117	0.496044	10	2.48276	32.7414	9.32327	0.284755	10	2.94828											Glomus intraradices	Glomeraceae	Plantago lanceolata	Forb	Plantaginaceae	Herbivore	Myzus ascalonicus	shoot
16	Gange	1999	International											10.8966	8.72352	0.800577	10	2.75862	26.069	9.59588	0.368096	10	3.03448											Glomus intraradices	Glomeraceae	Plantago lanceolata	Forb	Plantaginaceae	Herbivore	Myzus persicae	shoot
17	Gange	1999	International											13.2414	11.7768	0.889391	10	3.72414	22.7586	6.10647	0.268314	10	1.93103											Glomus intraradices	Glomeraceae	Plantago lanceolata	Forb	Plantaginaceae	Herbivore	Myzus persicae	shoot
18	Gange	2003	International											50.0637	27.3455	0.546215	20	6.11465	19.4904	15.3819	0.7892	20	3.43949											Glomus caledonium	Glomeraceae	Leucanthemum vulgare	Forb	Asteraceae	Herbivore	Chromatomyia syngenesiae	shoot
19	Gange	2003	International											50.0637	27.3455	0.546215	20	6.11465	25.2229	34.1819	1.35519	20	7.64331											Glomus fasiculatum	Glomeraceae	Leucanthemum vulgare	Forb	Asteraceae	Herbivore	Chromatomyia syngenesiae	shoot
20	Gange	2003	International											50.0637	27.3455	0.546215	20	6.11465	27.5159	34.1819	1.24226	20	7.64331											Glomus mosseae	Glomeraceae	Leucanthemum vulgare	Forb	Asteraceae	Herbivore	Chromatomyia syngenesiae	shoot
21	Gange	2005	International	84.3	7.60263	0.0901854	20	1.7	88.3	13.8636	0.157006	20	3.1	0.829	0.21019	0.253547	20	0.047	0.781	0.192302	0.246225	20	0.043											Glomus mosseae	Glomeraceae	Leucanthemum vulgare	Forb	Asteraceae	Herbivore	Chromatomyia syngenesiae	shoot
22	Gange	2005	International	84.3	7.60263	0.0901854	20	1.7	85.1	11.1803	0.131379	20	2.5	0.829	0.21019	0.253547	20	0.047	0.808	0.205718	0.254602	20	0.046											Glomus fasiculatum	Glomeraceae	Leucanthemum vulgare	Forb	Asteraceae	Herbivore	Chromatomyia syngenesiae	shoot
23	Gange	2005	International	84.3	7.60263	0.0901854	20	1.7	88.1	8.49706	0.0964479	20	1.9	0.829	0.21019	0.253547	20	0.047	0.866	0.160997	0.185909	20	0.036											Glomus caledoneum	Glomeraceae	Leucanthemum vulgare	Forb	Asteraceae	Herbivore	Chromatomyia syngenesiae	shoot
24	Goverde	2000	International	0.04	0.0707107	1.76777	50	0.01	0.84	0.636396	0.757614	50	0.09	13.0068	3.11946	0.239834	50	0.441158	24.2571	5.46488	0.22529	50	0.77285											Glomus sp	Glomeraceae	Lotus corniculatus	Forb	Fabaceae	Herbivore	Polyommatus icarus	shoot
25	Goverde	2000	International	0.04	0.0707107	1.76777	50	0.01	1.41	0.989949	0.702092	50	0.14	13.0068	3.11946	0.239834	50	0.441158	24.6975	7.01297	0.283955	50	0.991783											Glomus sp	Glomeraceae	Lotus corniculatus	Forb	Fabaceae	Herbivore	Polyommatus icarus	shoot
26	Hoffmann	2009	International											125.87	8.24883	0.0655345	23	1.72	121	6.98872	0.057758	22	1.49											Glomus mosseae	Glomeraceae	Phaseolus vulgaris	Forb	Fabaceae	Herbivore	Tetranychus urticae	shoot
27	Hempel	2009	International	1.39189	0.181303	0.130256	20	0.0405405	1.54054	0.0604343	0.0392293	20	0.0135135	8.83784	10.153	1.14881	20	2.27027	3.81081	5.43908	1.42728	20	1.21622											Glomus intraradices	Glomeraceae	Phleum pratense	Grass	Poaceae	Herbivore	Rhopalosiphum padi	shoot
28	Hempel	2009	International	1.39189	0.181303	0.130256	20	0.0405405	1.54054	0.241737	0.156917	20	0.0540541	8.83784	10.153	1.14881	20	2.27027	5.59459	7.61472	1.36108	20	1.7027											Glomus mosseae	Glomeraceae	Phleum pratense	Grass	Poaceae	Herbivore	Rhopalosiphum padi	shoot
29	Vicari	2002	International	1.47166	0.150849	0.102502	18	0.0355553	1.21216	0.150849	0.124446	18	0.0355553	57.8947	18.9804	0.327844	18		45.749	23.0546		18												Glomus mosseae	Glomeraceae	Lolium perenne	Grass	Poaceae	Herbivore	Phlogophorameticulosa	shoot
30	Wamberg	2003	International	0.81	0.32	0.395062	4	0.16	0.97	0.18	0.185567	4	0.09	2.34637	0.335196	0.142857	4	0.167598	0.653631	0.368715	0.564103	4	0.184358	69.2063	7.61905	0.110092	4	3.80952	45.0794	6.34921	0.140845	4	3.1746	Glomus intraradices	Glomeraceae	Pisum sativum	Forb	Fabaceae	Herbivore	Sitona lineatus	shoot
31	Wooley & Paine	2007	International											3.91608	2.31932	0.592254	11	0.699301	2.0979	1.15966	0.552771	11	0.34965											Glomus etunicatum	Non-Glomeraceae	Nicotiana rustica	Forb	Solanaceae	Herbivore	Tupiocoris notatus	shoot
32	Akhtar	2007	International	4.9	3.1117	0.635042	8		5.36	2.29125	0.427472	8												63	16.4725		8		57	15.4936		8		Glomus intraradices	Glomeraceae	Cicer arietinum	Forb	Fabaceae	Nematode	Meloidogyne incognita	Sedentary endoparasitic
33	Akhtar	2008	International	4.8	3.0482	0.635042	5		5.26	2.2485	0.427472	5		16098.6	5277.83			190.141	11978.9	283.445	0.0236621	5	126.761											Glomus intraradices	Glomeraceae	Cicer arietinum	Forb	Fabaceae	Nematode	Meloidogyne incognita	Sedentary endoparasitic
34	Akhtar	2008	International	3.52	2.23535	0.635042	5		3.98	1.70134	0.427472	5		13531.5	0	0	5	62.9371	11139.9	0	0	5	188.811											Glomus intraradices	Glomeraceae	Cicer arietinum	Forb	Fabaceae	Nematode	Meloidogyne incognita	Sedentary endoparasitic
35	Akhtar	2008b	International	4.88136	0.454793	0.0931695	5	0.20339	5.32203	0.227397	0.0427274	5	0.101695	17188.5	571.519	0.0332501	5	255.591	11693.3	285.759	0.0244379	5	127.796	63.9456	3.80284	0.0594699	5	1.70068	54.0816	1.52113	0.0281266	5	0.680272	Glomus intraradices	Glomeraceae	Cicer arietinum	Forb	Fabaceae	Nematode	Meloidogyne incognita	Sedentary endoparasitic
36	Akhtar	2008b	International	3.45763	0.303196	0.0876889	5	0.135593	3.89831	0.227397	0.0583322	5	0.101695	12268.4	428.639	0.0349386	5	191.693	9584.66	285.759	0.0298142	5	127.796	63.9456	3.80284	0.0594699	5	1.70068	47.9592	3.80284	0.0792932	5	1.70068	Glomus intraradices	Glomeraceae	Cicer arietinum	Forb	Fabaceae	Nematode	Meloidogyne incognita	Sedentary endoparasitic
37	Alraddad	1995	International	6.7	4.25478	0.635042	5		13.3	5.68538	0.427472	5		65	21.3099		5		22	11.0866	0.227273	5												Glomus mosseae	Glomeraceae	Lycopersicon esculentum	Forb	Solanaceae	Nematode	Meloidone javanica	Sedentary endoparasitic
38	Anjos	2010	International	3.6	2.28615	0.635042	6		4.47	1.9108	0.427472	6												1180.33	308.618		6		74	20.1145		6		Scutellospora heterogama	Non-Glomeraceae	Passiflora alata	Tree	Passifloraceae	Nematode	Meloidogyne incognita	Sedentary endoparasitic
39	Anjos	2010	International	3.89	2.47031	0.635042	6		5.1	2.18011	0.427472	6																						Scutellospora heterogama	Non-Glomeraceae	Passiflora alata	Tree	Passifloraceae	Nematode	Meloidogyne incognita	Sedentary endoparasitic
40	Anjos	2010	International	4.12	2.61637	0.635042	6		5.3	2.2656	0.427472	6																						Scutellospora heterogama	Non-Glomeraceae	Passiflora alata	Tree	Passifloraceae	Nematode	Meloidogyne incognita	Sedentary endoparasitic
41	Atilano	1981	International	17.8726	11.3499	0.635042	10		24.2183	10.3526	0.427472	10																						Glomus fasiculatum	Glomeraceae	Vitis vinifera	Tree	Vitaceae	Nematode	Meloidogyne arenari	Sedentary endoparasitic
42	Atilano	1981	International	12.2231	7.76218	0.635042	10		15.4349	6.59798	0.427472	10																						Glomus fasiculatum	Glomeraceae	Vitis vinifera	Tree	Vitaceae	Nematode	Meloidogyne arenari	Sedentary endoparasitic
43	Bagyaraj	1979	International	3.85	2.44491	0.635042	12		5.91	2.52636	0.427472	12		510	167.2		12		253	127.496		12		37	9.6743		12		35	9.51363		12		Glomus fasiculatum	Glomeraceae	Lycopersieon esculentum	Forb	Solanaceae	Nematode	M. incognita	Sedentary endoparasitic
44	Bagyaraj	1979	International	5.39	3.42287	0.635042	12		5.56	2.37675	0.427472	12		1240	406.526		12		872	439.433		12		60	15.6881		12		73	19.8427		12		Glomus fasiculatum	Glomeraceae	Lycopersieon esculentum	Forb	Solanaceae	Nematode	M. incognita	Sedentary endoparasitic
45	Bagyaraj	1979	International	4.78	3.0355	0.635042	12		5.25	2.24423	0.427472	12		165	54.0942		12		164	82.6456		12		41	10.7202		12		60	16.3091		12		Glomus fasiculatum	Glomeraceae	Lycopersieon esculentum	Forb	Solanaceae	Nematode	M. incognita	Sedentary endoparasitic
46	Bagyaraj	1979	International	4.98	3.16251	0.635042	12		5.63	2.40667	0.427472	12		483	158.349		12		378	190.488		12		34	8.8899		12		35	9.51363		12		Glomus fasiculatum	Glomeraceae	Lycopersieon esculentum	Forb	Solanaceae	Nematode	M. javanica	Sedentary endoparasitic
47	Bagyaraj	1979	International	4.89	3.10535	0.635042	12		6.5	2.77857	0.427472	12		617	202.28		12		402	202.583		12		84	21.9633		12		79	21.4736		12		Glomus fasiculatum	Glomeraceae	Lycopersieon esculentum	Forb	Solanaceae	Nematode	M. javanica	Sedentary endoparasitic
48	Bagyaraj	1979	International	3.55	2.2544	0.635042	12		5.56	2.37675	0.427472	12		690	226.212		12		308	155.213		12		35	9.15137		12		41	11.1445		12		Glomus fasiculatum	Glomeraceae	Lycopersieon esculentum	Forb	Solanaceae	Nematode	M. javanica	Sedentary endoparasitic
49	Calvet	1995	International	8.81	5.59472	0.635042	9		14.5	6.19835	0.427472	9		7410	2429.32		9		10049	5064.06		9		91.8	24.0027		9		65.4	17.7769		9		Glomus intraradices	Glomeraceae	Cydonia oblonga	Tree	Rosaceae	Nematode	Pratylenchus vulnus	Migratory endoparasites
50	Camprubi	1993	International	0.43	0.273068	0.635042	8		1.38	0.589912	0.427472	8		660	216.377		8		440	221.732		8												Glomus mossae	Glomeraceae	Prunus insititia	Tree	Rosaceae	Nematode	Pratylenchus vulnus	Migratory endoparasites
51	Camprubi	1993	International	0.61	0.387375	0.635042	8		2.85	1.2183	0.427472	8		470	154.087		8		700	352.756		8												Glomus mossae	Glomeraceae	Prunus cerasifera	Tree	Rosaceae	Nematode	Pratylenchus vulnus	Migratory endoparasites
52	Camprubi	1993	International	1.22	0.774751	0.635042	8		1.33	0.568538	0.427472	8		140	45.8981		8		300	151.181		8												Glomus mossae	Glomeraceae	Prunus munsoniana	Tree	Rosaceae	Nematode	Pratylenchus vulnus	Migratory endoparasites
53	Camprubi	1993	International	0.17	0.107957	0.635042	8		0.14	0.0598461	0.427472	8																						Glomus mossae	Glomeraceae	Prunus insititia	Tree	Rosaceae	Nematode	Pratylenchus vulnus	Migratory endoparasites
54	Camprubi	1993	International	0.02	0.0127008	0.635042	8		0.52	0.222286	0.427472	8																						Glomus mossae	Glomeraceae	Prunus cerasifera	Tree	Rosaceae	Nematode	Pratylenchus vulnus	Migratory endoparasites
55	Camprubi	1993	International	0.04	0.0254017	0.635042	8		0.25	0.106868	0.427472	8																						Glomus mossae	Glomeraceae	Prunus munsoniana	Tree	Rosaceae	Nematode	Pratylenchus vulnus	Migratory endoparasites
56	Carling	1989	International	6.6	4.19127	0.635042	10		31.2	13.3371	0.427472	10		2.7	0.885179		10		0.5	0.251968		10												Gigaspora margarita	Non-Glomeraceae	Glycine max	Forb	Fabaceae	Nematode	Meloidogyne incognita	Sedentary endoparasitic
57	Carling	1989	International	6.6	4.19127	0.635042	10		39	16.6714	0.427472	10		2.7	0.885179		10		0.4	0.201575		10												Glomus etunicatum	Non-Glomeraceae	Glycine max	Forb	Fabaceae	Nematode	Meloidogyne incognita	Sedentary endoparasitic
58	Carling	1995	International	39	24.7666	0.635042	8		227	97.0362	0.427472			0.43	0.140973		8		1.33	0.670236		8												Gigaspora margarita	Non-Glomeraceae	Arachis hypogaea	Forb	Fabaceae	Nematode	Meloidogyne incognita	Sedentary endoparasitic
59	Carling	1995	International	39	24.7666	0.635042	8		269	114.99	0.427472			0.43	0.140973		8		1	0.503937		8												Glomus etunicatum	Non-Glomeraceae	Arachis hypogaea	Forb	Fabaceae	Nematode	Meloidogyne incognita	Sedentary endoparasitic
60	Castillo	2006	International	3.01	1.91148	0.635042	20		8.96	3.83015	0.427472	20		1.5	0.491766		20		1.1	0.55433		20		83.4	21.8064		20		94.6	25.714		20		Glomus intraradices	Glomeraceae	Olea europaea	Tree	Oleaceae	Nematode	Meloidogyne incognita	Sedentary endoparasitic
61	Castillo	2006	International	3.01	1.91148	0.635042	20		5.83	2.49216	0.427472	20		1.5	0.491766		20		1.2	0.604724		20		83.4	21.8064		20		93.6	25.4422		20		Glomus mosseae	Glomeraceae	Olea europaea	Tree	Oleaceae	Nematode	Meloidogyne javanica	Sedentary endoparasitic
62	Castillo	2006	International	3.26	2.07024	0.635042	20		8.19	3.501	0.427472	20		1.7	0.557335		20		1.2	0.604724		20		78	20.3945		20		80	21.7454		20		Glomus intraradices	Glomeraceae	Olea europaea	Tree	Oleaceae	Nematode	Meloidogyne incognita	Sedentary endoparasitic
63	Castillo	2006	International	3.26	2.07024	0.635042	20		5.25	2.24423	0.427472	20		1.7	0.557335		20		1.3	0.655118		20		78	20.3945		20		78.2	21.2562		20		Glomus mosseae	Glomeraceae	Olea europaea	Tree	Oleaceae	Nematode	Meloidogyne javanica	Sedentary endoparasitic
64	Castillo	2006	International	10.62	6.74414	0.635042	20		13.17	5.62981	0.427472	20		1.3	0.426197		20		0.9	0.453543		20		79.2	20.7082		20		94.4	25.6596		20		Glomus intraradices	Glomeraceae	Olea europaea	Tree	Oleaceae	Nematode	Meloidogyne incognita	Sedentary endoparasitic
65	Castillo	2006	International	10.62	6.74414	0.635042	20		11.03	4.71502	0.427472	20		1.3	0.426197		20		1	0.503937		20		79.2	20.7082		20		91.4	24.8442		20		Glomus mosseae	Glomeraceae	Olea europaea	Tree	Oleaceae	Nematode	Meloidogyne javanica	Sedentary endoparasitic
66	Castillo	2006	International	10.65	6.76319	0.635042	20		13.77	5.88629	0.427472	20		1.4	0.458981		20		1	0.503937		20		71.2	18.6165		20		76.2	20.7125		20		Glomus intraradices	Glomeraceae	Olea europaea	Tree	Oleaceae	Nematode	Meloidogyne incognita	Sedentary endoparasitic
67	Castillo	2006	International	10.65	6.76319	0.635042	20		13.16	5.62553	0.427472	20		1.4	0.458981		20		1	0.503937		20		71.2	18.6165		20		71.8	19.5165		20		Glomus mosseae	Glomeraceae	Olea europaea	Tree	Oleaceae	Nematode	Meloidogyne javanica	Sedentary endoparasitic
68	del Carmen Jaizme-Vega	2006	International	124.51	20.3771	0.163658	12	5.88235	203.922	30.5656	0.149889	12	8.82353	1961	642.902		12		305	153.701		12		15.3792	8.66025	0.563114	12	2.5	12.0861	6.66017	0.55106	12	1.92263	Glomus mossae	Glomeraceae	Carica papaya	Tree	Caricaceae	Nematode	Meloidogyne incognita	Sedentary endoparasitic
69	del Carmen Jaizme-Vega	2006	International	124.51	20.3771	0.163658	12	5.88235	186.275	20.3771	0.109393	12	5.88235	1961	642.902		12		8	4.03149		12		24.701	6.00024	0.242915	12	1.73212	24.8694	7.9972	0.321568	12	2.30859	Glomus manihotis	Glomeraceae	Carica papaya	Tree	Caricaceae	Nematode	Meloidogyne incognita	Sedentary endoparasitic
70	Deliopoulos	2010	International	5.2	3.30222	0.635042	5		5.54	2.3682	0.427472	5		0.98	0.321287		5		0.69	0.347716		5												Glomus intraradices	Glomeraceae	Solanum tuberosum.	Forb	Solanaceae	Nematode	Globodera pallida	Sedentary endoparasitic
71	Deliopoulos	2010	International	5.2	3.30222	0.635042	5		5.49	2.34682	0.427472	5		0.98	0.321287		5		0.81	0.408189		5												Glomus mosseae	Glomeraceae	Solanum tuberosum.	Forb	Solanaceae	Nematode	Globodera pallida	Sedentary endoparasitic
72	Deliopoulos	2010	International	4.32	2.74338	0.635042	5		4.4	1.88088	0.427472	5		0.37	0.121302		5		0.27	0.136063		5												Glomus intraradices	Glomeraceae	Solanum tuberosum.	Forb	Solanaceae	Nematode	Globodera pallida	Sedentary endoparasitic
73	Deliopoulos	2010	International	4.32	2.74338	0.635042	5		4.38	1.87233	0.427472	5		0.37	0.121302		5		0.26	0.131024		5												Glomus mosseae	Glomeraceae	Solanum tuberosum.	Forb	Solanaceae	Nematode	Globodera pallida	Sedentary endoparasitic
74	Diedhiou	2003	International	4.7	2.9847	0.635042	10		5.1	2.18011	0.427472	10		156.927	41.0668	0.261694	10		64.9098	25.419	0.391605	10		38.8439	8.3237	0.214286	10		30.0578	6.01156	0.2	10		Glomus coronatum	Glomeraceae	Lycopersicon esculentum	Forb	Solanaceae	Nematode	Meloidogyne incognita	Sedentary endoparasitic
75	Elsen	2003	International	1.1	0.698546	0.635042	8		1.9	0.812197	0.427472	8		9964	3266.64		8		3700	1864.57		8		45	11.766		8		24	6.52363		8		Glomus mosseae	Glomeraceae	Musa cultivar Grande Naine	Grass	Poaceae	Nematode	Radopholus similis	Migratory endoparasites
76	Elsen	2003	International	1.6	1.01607	0.635042	8		1.9	0.812197	0.427472	8		533	174.741		8		51	25.7008		8		45	11.766		8		39	10.6009		8		Glomus mosseae	Glomeraceae	Musa cultivar Grande Naine	Grass	Poaceae	Nematode	Radopholus similis	Migratory endoparasites
77	Elsen	2003	International	2.6	1.65111	0.635042	8		5.8	2.47934	0.427472	8		1685	552.417		8		332	167.307		8		65	16.9954		8		41	11.1445		8		Glomus mosseae	Glomeraceae	Musa cultivar Grande Naine	Grass	Poaceae	Nematode	Pratylenchus coffeae	Migratory endoparasites
78	Elsen	2003	International	1.2	0.76205	0.635042	8		2	0.854944	0.427472	8		5090	1668.73		8		1080	544.252		8		65	16.9954		8		46	12.5036		8		Glomus mosseae	Glomeraceae	Musa cultivar Pisang Jari Buaya	Grass	Poaceae	Nematode	Radopholus similis	Migratory endoparasites
79	Elsen	2003	International	1.7	1.07957	0.635042	8		2.1	0.897692	0.427472	8		120	39.3413		8		320	161.26		8		65	16.9954		8		31	8.42636		8		Glomus mosseae	Glomeraceae	Musa cultivar Pisang Jari Buaya	Grass	Poaceae	Nematode	Radopholus similis	Migratory endoparasites
80	Elsen	2003	International	2.2	1.39709	0.635042	8		5.6	2.39384	0.427472	8		1049	343.908		8		222	111.874		8		65	16.9954		8		48	13.0473		8		Glomus mosseae	Glomeraceae	Musa cultivar Pisang Jari Buaya	Grass	Poaceae	Nematode	Pratylenchus coffeae	Migratory endoparasites
81	Elsen	2003b	International	0.8	0.508033	0.635042	8		2	0.854944	0.427472	8		1336	437.999		8		314	158.236		8		53	13.8578		8		31	8.42636		8		Glomus mosseae	Glomeraceae	Musa cultivar Grande Naine	Grass	Poaceae	Nematode	Radopholus similis	Migratory endoparasites
82	Elsen	2003b	International	1.5	0.952562	0.635042	8		2.7	1.15418	0.427472	8		218	71.47		8		74	37.2913		8		53	13.8578		8		58	15.7654		8		Glomus mosseae	Glomeraceae	Musa cultivar Grande Naine	Grass	Poaceae	Nematode	Radopholus similis	Migratory endoparasites
83	Elsen	2003b	International	0.4	0.254017	0.635042	8		1.1	0.470219	0.427472	8		100	32.7844		8		74	37.2913		8		89	23.2706		8		89	24.1918		8		Glomus mosseae	Glomeraceae	Musa cultivar Grande Naine	Grass	Poaceae	Nematode	Pratylenchus coffeae	Migratory endoparasites
84	Elsen	2003b	International	0.3	0.190512	0.635042	8		1.7	0.726703	0.427472	8		252	82.6167		8		142	71.559		8		39	10.1972		8		40	10.8727		8		Glomus mosseae	Glomeraceae	Musa cultivar Pisang Jari Buaya	Grass	Poaceae	Nematode	Radopholus similis	Migratory endoparasites
85	Elsen	2003b	International	1.2	0.76205	0.635042	8		1.6	0.683956	0.427472	8		171	56.0613		8		79	39.811		8		39	10.1972		8		33	8.96999		8		Glomus mosseae	Glomeraceae	Musa cultivar Pisang Jari Buaya	Grass	Poaceae	Nematode	Radopholus similis	Migratory endoparasites
86	Elsen	2003b	International	0.3	0.190512	0.635042	8		1.6	0.683956	0.427472	8		234	76.7155		8		57	28.7244		8		64	16.7339		8		48	13.0473		8		Glomus mosseae	Glomeraceae	Musa cultivar Pisang Jari Buaya	Grass	Poaceae	Nematode	Pratylenchus coffeae	Migratory endoparasites
87	Elsen	2008	International											28097	2574.63	0.0916335	8		7276.12	1455.22	0.2	8												Glomus intraradices	Glomeraceae	Musa cultivar Grande Naine	Grass	Poaceae	Nematode	Radopholus similis	Migratory endoparasites
88	Elsen	2008	International											7168.32	2930.69	0.40884	8		1148.51	554.455	0.482759	8												Glomus intraradices	Glomeraceae	Musa cultivar Grande Naine	Grass	Poaceae	Nematode	Pratylenchus coffeae	Migratory endoparasites
89	Forge	2001	International	21.4	13.5899	0.635042	20		22	9.40439	0.427472	20		2053	673.064		20		2470	1244.72		20												Glomus clarum	Glomeraceae	Malus domestica	Tree	Rosaceae	Nematode	Pratylenchus penetrans	Migratory endoparasites
90	Forge	2001	International	21.4	13.5899	0.635042	20		24.4	10.4303	0.427472	20		2053	673.064		20		3812	1921.01		20												Glomus etunicatum	Non-Glomeraceae	Malus domestica	Tree	Rosaceae	Nematode	Pratylenchus penetrans	Migratory endoparasites
91	Forge	2001	International	21.4	13.5899	0.635042	20		28.1	12.012	0.427472	20		2053	673.064		20		1355	682.834		20												Glomus intraradices	Glomeraceae	Malus domestica	Tree	Rosaceae	Nematode	Pratylenchus penetrans	Migratory endoparasites
92	Forge	2001	International	21.4	13.5899	0.635042	20		28.2	12.0547	0.427472	20		2053	673.064		20		1495	753.386		20												Glomus mosseae	Glomeraceae	Malus domestica	Tree	Rosaceae	Nematode	Pratylenchus penetrans	Migratory endoparasites
93	Grandison	1986	International	10	6.35042	0.635042	10		128	54.7164	0.427472	10		1.99937	0.655482		10		0.215124	0.108409		10		75	19.6101		10		62	16.8527		10		Glomus sp	Glomeraceae	Medicago sativa	Forb	Fabaceae	Nematode	Meloidogyne hapla	Sedentary endoparasitic
94	Grandison	1986	International	16	10.1607	0.635042	10		137	58.5637	0.427472	10		2.66841	0.87482		10		0.234681	0.118264		10		75	19.6101		10		64	17.3963		10		Glomus sp	Glomeraceae	Medicago sativa	Forb	Fabaceae	Nematode	Meloidogyne hapla	Sedentary endoparasitic
95	Hussey	1978	International	22.7	14.4154	0.635042	10		44.1	18.8515	0.427472	10		4.41491	1.4474		10		1.49963	0.755718		10												Gigaspora margarita	Non-Glomeraceae	Gossypium hirsutum	Forb	Malvaceae	Nematode	Pratylenchus brachyurus	Migratory endoparasites
96	Jaizme-Vega	1997	International	80	50.8033	0.635042	14		203	86.7769	0.427472	14		90	29.506		14		52	26.2047		14		86	22.4862		14		88	23.92		14		Glomus mosseae	Glomeraceae	Musa AAA	Grass	Poaceae	Nematode	Meloidogyne incognita	Sedentary endoparasitic
97	Jaizme-Vega	1997	International	80	50.8033	0.635042	14		203	86.7769	0.427472	14		90	29.506		14		54	27.2126		14		86	22.4862		14		81	22.0173		14		Glomus mosseae	Glomeraceae	Musa AAA	Grass	Poaceae	Nematode	Meloidogyne incognita	Sedentary endoparasitic
98	Jaizme-Vega & Pinochet	1997	International	21.7	13.7804	0.635042	15		23.5	10.0456	0.427472	15		830	272.11		15		510	257.008		15												Glomus intraradices	Glomeraceae	Musa AAA	Grass	Poaceae	Nematode	Pratylenchus goodeyion	Migratory endoparasites
99	Jaizme-Vega & Pinochet	1997	International	21.7	13.7804	0.635042	15		24.7	10.5586	0.427472	15		830	272.11		15		640	322.52		15												Glomus aggregatum	Glomeraceae	Musa AAA	Grass	Poaceae	Nematode	Pratylenchus goodeyion	Migratory endoparasites
100	Jaizme-Vega & Pinochet	1997	International	21.7	13.7804	0.635042	15		25.1	10.7296	0.427472	15		830	272.11		15		740	372.913		15												Glomus mosseae	Glomeraceae	Musa AAA	Grass	Poaceae	Nematode	Pratylenchus goodeyion	Migratory endoparasites
101	Jalaluddin	2008	International	13	8.25554	0.635042	5		16	6.83956	0.427472	5		24	7.86825		5		8	4.03149		5		90	23.5321		5		70	19.0273		5		Glomus callosum	Non-Glomeraceae	Helianthus annuus	Grass	Poaceae	Nematode	Meloidogyne incognita	Sedentary endoparasitic
102	Lax	2011	International	0.3	0.1	0.333333	5		0.3	0.1	0.333333	5		42.8	14.0317		5		17.9	9.02047		5		30	10.3	0.343333	5		45.7	7.1	0.155361	5		Glomus intraradices	Glomeraceae	Lycopersicon esculentum	Forb	Solanaceae	Nematode	Nacobbus aberrans	Sedentary endoparasitic
103	MacGuidwin	1980	International	2.68761	1.30296	0.484801	6		1.873	0.651741	0.347966	6		89.0769	29.2033		6		7.84615	3.95397		6												Glomus fasiculatum	Glomeraceae	Allium cepa	Forb	Amaryllidaceae	Nematode	Meloidogyne hapla	Sedentary endoparasitic
104	O'Bannon	1979	International	6.15	3.90551	0.635042	15		9.48	4.05244	0.427472	15		662	217.033		15		314	158.236		15												Glomus mosseae	Glomeraceae	Citrus lirnon	Tree	Rutaceae	Nematode	Tylenchulus semipenetrans	Migratory endoparasites
105	O'Bannon & Nemec	1979	International	0.5	0.317521	0.635042	10		6.1	2.60758	0.427472	10		157.6	51.6682		10		85.9	43.2882		10		1.11	0.290229		10		0.84	0.228327		10		Glomus etunicatum	Non-Glomeraceae	Citrus limon	Tree	Rutaceae	Nematode	Radopholus similis	Migratory endoparasites
106	Pandey	2005	International	27.3	17.3366	0.635042	5		29.5	12.6104	0.427472	5		3480	1140.9		5		2080	1048.19		5												Glomus aggregatum	Glomeraceae	Artemisia pallens	Forb	Asteraceae	Nematode	Meloidogyne incognita	Sedentary endoparasitic
107	Pandey	2005	International	27.3	17.3366	0.635042	5		30.4	12.9952	0.427472	5		3480	1140.9		5		1880	947.401		5												Glomus fasciculatum	Glomeraceae	Artemisia pallens	Forb	Asteraceae	Nematode	Meloidogyne incognita	Sedentary endoparasitic
108	Pandey	1999	International	38.4	24.3856	0.635042	5		47.5	20.3049	0.427472	5		4	1.31138		5		1	0.503937		5		88	23.0092		5		75	20.3863		5		Glomus aggregatum	Glomeraceae	Hyoscyamus niger	Forb	Solanaceae	Nematode	Meloidogyne incognita	Sedentary endoparasitic
109	Pandey	1999	International	38.4	24.3856	0.635042	5		41.7	17.8256	0.427472	5		4	1.31138		5		1.6	0.806299		5		57	14.9037		5		45	12.2318		5		Glomus fasiculatum	Glomeraceae	Hyoscyamus niger	Forb	Solanaceae	Nematode	Meloidogyne incognita	Sedentary endoparasitic
110	Pandey	1999	International	38.4	24.3856	0.635042	5		40.3	17.2271	0.427472	5		4	1.31138		5		2.3	1.15905		5		69	18.0413		5		53	14.4063		5		Glomus mosseae	Glomeraceae	Hyoscyamus niger	Forb	Solanaceae	Nematode	Meloidogyne incognita	Sedentary endoparasitic
111	Pandey	2009	International	3.5	2.22265	0.635042	5		9.9	4.23198	0.427472	5		7168	2349.99		5		5550	2796.85		5												Glomus mosseae	Glomeraceae	Pogostemon cablin	Forb	Solanaceae	Nematode	Meloidogyne incognita	Sedentary endoparasitic
112	Pinochet	1995	International	10.1	6.41392	0.635042	8		14.9	6.36934	0.427472	8		41740	13684.2		8		24330	12260.8		8		27	6	0.222222	8		26	8	0.307692	8		Glomus mosseae	Glomeraceae	Prunus Persica	Tree	Rosaceae	Nematode	Pratylenchus vulnus	Migratory endoparasites
113	Pinochet	1995b	International	28.61	18.1685	0.635042	9		63.91	27.3198	0.427472	9		64670	21201.7		9		99860	50323.1		9		76	19.8715		9		68	18.4836		9		Glomus intraradices	Glomeraceae	Prunus mahaleb	Tree	Rosaceae	Nematode	Pratylenchus vulnus	Migratory endoparasites
114	Pinochet	1993	International	2.65	1.68286	0.635042	10		7.97	3.40695	0.427472	10		18350	6015.94		10		8980	4525.35		10		40	10.4587		10		37	10.0573		10		Glomus mosseae	Glomeraceae	Malus silvestris	Tree	Rosaceae	Nematode	Pratylenchus vulnus	Migratory endoparasites
115	Pinochet	1998	International	7.7	4.88982	0.635042	8		17	7.26703	0.427472	8		2674	876.655		8		2700	1360.63		8		68.5	17.9105		8		54.6	14.8413		8		Glomus intraradices	Glomeraceae	Prunus cerasifera	Tree	Rosaceae	Nematode	Pratylenchus vulnus	Migratory endoparasites
116	Pinochet	1997	International	77	48.8982	0.635042	10		144	61.556	0.427472	10		1510	495.044		10		2560	1290.08		10		37	9.6743		10		27	7.33908		10		Glomus intraradices	Glomeraceae	Musa AAA	Tree	Poaceae	Nematode	Meloidogyne javanica	Sedentary endoparasitic
117	Roncadori & Hussey	1997	International	13.8	8.76357	0.635042	10		78.6	33.5993	0.427472	10		3.62422	1.18818		10		4.42809	2.23148		10		14.5138	3.7949		10		7.98426	2.17027		10		Gigaspora margarita	Non-Glomeraceae	Gossypium hirsutum	Forb	Malvaceae	Nematode	Meloidogyne incognita	Sedentary endoparasitic
118	Roncadori & Hussey	1997	International	9	5.71537	0.635042	10		89.9	38.4298	0.427472	10		2.10787	0.691051		10		4.11832	2.07537		10		51.6028	13.4925		10		25.8027	7.01363		10		Gigaspora margarita	Non-Glomeraceae	Gossypium hirsutum	Forb	Malvaceae	Nematode	Meloidogyne incognita	Sedentary endoparasitic
119	Sankaranarayanan & Sundarababu	2010	International	7.4	4.69931	0.635042	3		25.8	11.0288	0.427472	3		570	186.871		3		290	146.142		3												Glomus mosseae	Glomeraceae	Vigna mungo	Forb	Fabaceae	Nematode	Meloidogyne incognita	Sedentary endoparasitic
120	Siddiqui & Akhtar	2007b	International	8.6	5.46136	0.635042	10		13.3	5.68538	0.427472	10		20490	6717.52		10		8140	4102.05		10		57	14.9037		10		52	14.1345		10		Glomus mosseae	Glomeraceae	Lycopersicon esculentum	Forb	Solanaceae	Nematode	Meloidogyne incognita	Sedentary endoparasitic
121	Siddiqui & Akhtar	2007b	International	8.6	5.46136	0.635042	10		12.6	5.38615	0.427472	10		20490	6717.52		10		10160	5120		10		53	13.8578		10		46	12.5036		10		Glomus margarita	Non-Glomeraceae	Lycopersicon esculentum	Forb	Solanaceae	Nematode	Meloidogyne incognita	Sedentary endoparasitic
122	Siddiqui & Akhtar	2007a	International	4.85852	0.486804	0.100196	8	0.172111	5.15305	0.41726	0.0809735	8	0.147524	130.09	19.488	0.149804	8	6.89006	98.369	12.2917	0.124955	8	4.34576	61.7978	6.99162	0.113137	8	2.47191	56.8539	5.08481	0.0894364	8	1.79775	Glomus intraradices	Glomeraceae	Cicer arietinum	Forb	Fabaceae	Nematode	Meloidogyne incognita	Sedentary endoparasitic
123	Siddiqui & Akhtar	2008	International	6.6	0.928828	0.140732	5	0.415385	8.95385	0.309609	0.0345784	5	0.138462	14919.5	1115.13	0.0747432	5	498.701	9184.42	464.638	0.0505898	5	207.792											Glomus intraradices	Glomeraceae	Lycopersicon esculentum	Forb	Solanaceae	Nematode	Meloidogyne incognita	Sedentary endoparasitic
124	Siddiqui & Akhtar	2009	International	11.62	0.43	0.0370052	5		15.21	0.25	0.0164366	5		14760	4838.98		5		9840	4958.74		5		54	14.1193		5		51	13.8627		5		Glomus intraradices	Glomeraceae	Solanum lycopersicum	Forb	Solanaceae	Nematode	Meloidogyne incognita	Sedentary endoparasitic
125	Siddiqui & Akhtar	2009	International	11.62	0.43	0.0370052	5		15.09	0.39	0.0258449	5		14760	4838.98		5		11130	5608.82		5		48	12.5504		5		44	11.96		5		Gigaspora margarita	Non-Glomeraceae	Solanum lycopersicum	Forb	Solanaceae	Nematode	Meloidogyne incognita	Sedentary endoparasitic
126	Siddiqui & Akhtar	1995	International	5.82	3.69594	0.635042	5		7.15	3.05643	0.427472	5		5740	1881.82		5		3480	1753.7		5		62	16.211		5		57	15.4936		5		Glomus fasiculatum	Glomeraceae	Cajanus cajan	Forb	Fabaceae	Nematode	Heterodera cajani	Sedentary endoparasitic
127	Siddiqui & Akhtar	1995b	International	6.6	4.19127	0.635042	5		7.68	3.28299	0.427472	5		6110	2003.13		5		4350	2192.13		5		57	14.9037		5		48	13.0473		5		Gigaspora margarita	Non-Glomeraceae	Cajanus cajan	Forb	Fabaceae	Nematode	Heterodera cajani	Sedentary endoparasitic
128	Siddiqui & Mahmood	1998	International	8.71	5.53121	0.635042	5		10.35	4.42434	0.427472	5		26300	8622.29		5		21460	10814.5		5		57	14.9037		5		53	14.4063		5		Glomus mosseae	Glomeraceae	Lycopersicon esculentum	Forb	Solanaceae	Nematode	Meloidogyne javanica	Sedentary endoparasitic
129	Siddiqui & Mahmood	2001	International	7.9	5.01683	0.635042	5		16.2	6.92505	0.427472	5		39430	12926.9		5		8250	4157.48		5		52	13.5963		5		56	15.2218		5		Glomus mosseae	Glomeraceae	Cicer arietinum	Forb	Fabaceae	Nematode	Meloidogyne javanica	Sedentary endoparasitic
130	Smith & Kaplan	1988	International	8.06	5.11844	0.635042	3		9.84	4.20633	0.427472	3		1479	484.881		3		238	119.937		3												Glomus intraradices	Glomeraceae	Citrus limon	Tree	Rutaceae	Nematode	Radopholus trophilus	Migratory endoparasites
131	Smith & Kaplan	1986	International	49	31.117	0.635042	4		59	25.2209	0.427472	4		135	44.2589		4		82	41.3228		4		65	16.9954		4		49	13.3191		4		Glomus intraradices	Glomeraceae	Gossypium hirsutum	Forb	Malvaceae	Nematode	Meloidogyne incognita	Sedentary endoparasitic
132	Strobel	1982	International	6.9	4.38179	0.635042	8		12.3	5.25791	0.427472	8																						Glomus etunicatum	Non-Glomeraceae	Prunus persica	Tree	Rosaceae	Nematode	Meloidogyne incognita	Sedentary endoparasitic
133	Strobel	1982	International	6.9	4.38179	0.635042	8		17.5	7.48076	0.427472	8																						Gigaspora margarita	Non-Glomeraceae	Prunus persica	Tree	Rosaceae	Nematode	Meloidogyne incognita	Sedentary endoparasitic
134	Talavera	2001	International	12.9	8.19204	0.635042	5		16	6.83956	0.427472	5		216	70.8143		5		54	27.2126		5												Glomus mosseae	Glomeraceae	Lycopersicum esculentum	Forb	Solanaceae	Nematode	Meloidogyne incognita	Sedentary endoparasitic
135	Talavera	2001	International	4.1	2.60367	0.635042	5		12.6	5.38615	0.427472	5		60	19.6706		5		31	15.622		5		60.8	15.8972		5		41.3	11.2261		5		Glomus sp	Glomeraceae	Daucus carota	Forb	Apiaceae	Nematode	Pratylenchus penetrans	Migratory endoparasites
136	Talavera	2002	International	18.5	11.7483	0.635042	8		19.3	8.25021	0.427472	8		13000	4261.97		8		8900	4485.04		8		44.2	11.5569		8		36.4	9.89417		8		Glomus sp	Glomeraceae	Lycopersicum esculentum	Forb	Solanaceae	Nematode	Meloidogyne incognita	Sedentary endoparasitic
137	Talavera	2002	International	23.7	15.0505	0.635042	8		29.4	12.5677	0.427472	8		9500	3114.52		8		4800	2418.9		8		43	11.2431		8		39.8	10.8184		8		Glomus sp	Glomeraceae	Lycopersicum esculentum	Forb	Solanaceae	Nematode	Meloidogyne incognita	Sedentary endoparasitic
138	Teixeira dos Anjos	2010	International	3.6	2.28615	0.635042	6		4.47	1.9108	0.427472	6																						Scutellospora heterogama	Non-Glomeraceae	Passiflora alata	Tree	Passifloraceae	Nematode	Meloidogyne incognita	Sedentary endoparasitic
139	Teixeira dos Anjos	2010	International	3.89	2.47031	0.635042	6		5.1	2.18011	0.427472	6																						Scutellospora heterogama	Non-Glomeraceae	Passiflora alata	Tree	Passifloraceae	Nematode	Meloidogyne incognita	Sedentary endoparasitic
140	Teixeira dos Anjos	2010	International	4.12	2.61637	0.635042	6		5.3	2.2656	0.427472	6																						Scutellospora heterogama	Non-Glomeraceae	Passiflora alata	Tree	Passifloraceae	Nematode	Meloidogyne incognita	Sedentary endoparasitic
141	Heald	1989	International	0.809154	0.513847	0.635042	10		3.77178	1.61233	0.427472	10																						Glomus intraradices	Glomeraceae	Cucumis melo	Forb	Cucurbitaceae	Nematode	Meloidogyne incognita	Sedentary endoparasitic
142	Vaast	1997	International	23	31.305	1.36108	5	14	65	49.1935	0.756823	5	22	147	199.01	1.35381	5	89	209	178.885	0.855911	5	80	11	2.23607	0.203279	5	1	7	4.47214		5	2	Acaulospora mellea	Non-Glomeraceae	Coffea arabica	Tree	Coffeaceae	Nematode	Pratylenchus coffeae	Migratory endoparasites
143	Vaast	1997	International	23	31.305	1.36108	5	14	33	35.7771	1.08415	5	16	147	199.01	1.35381	5	89	184	190.066	1.03297	5	85	12	4.47214	0.372678	5	2	13	6.7082		5	3	Glomus clarum	Glomeraceae	Coffea arabica	Tree	Coffeaceae	Nematode	Pratylenchus coffeae	Migratory endoparasites
144	Vos	2012	International											49.1736	40.907	0.83189	8	14.4628	3.18182	6.54512	2.05704	8	2.31405											Glomus mosseae	Glomeraceae	Solanum lycopersicum	Forb	Solanaceae	Nematode	Meloidogyne incognita	Sedentary endoparasitic
145	Waceke	2001	International	3.36	2.13374	0.635042	6		4.56	1.94927	0.427472	6		1171.34	384.017		6		303.82	153.106		6		44.33	11.5909		6		34.67	9.42393		6		Glomus etunicatum	Non-Glomeraceae	Chrysanthemum cinerariefolium	Forb	Asteraceae	Nematode	Meloidogyne hapla	Sedentary endoparasitic
146	Waceke	2001	International	3.36	2.13374	0.635042	6		5.4	2.30835	0.427472	6		1171.34	384.017		6		289	145.638		6		48.5	12.6812		6		45	12.2318		6		Glomus sp	Glomeraceae	Chrysanthemum cinerariefolium	Forb	Asteraceae	Nematode	Meloidogyne hapla	Sedentary endoparasitic
147	Waceke	2002	International	3.36	2.13374	0.635042	6		4.74	2.02622	0.427472	6		1350	442.589		6		292	147.15		6		57.76	15.1024		6		52.73	14.333		6		Glomus sp	Glomeraceae	Chrysanthemum cinerariefolium	Forb	Asteraceae	Nematode	Meloidogyne hapla	Sedentary endoparasitic
148	Zhang	2008	International	2.74	0.707107	0.258068	8	0.25	2.82	1.27279	0.451345	8	0.45	694	384.666	0.554274	8	136	146	45.2548	0.309965	8	16	68	5.65685	0.083189	8	2	62	8.48528	0.136859	8	3	Glomus intraradices	Glomeraceae	Cucumis sativus	Forb	Cucurbitaceae	Nematode	Meloidogyne incognita	Sedentary endoparasitic
149	Zhang	2008	International	2.74	0.707107	0.258068	8	0.25	4.52	0.735391	0.162697	8	0.26	694	384.666	0.554274	8	136	334	271.529	0.812961	8	96	68	8.48528	0.124784	8	3	52	11.3137	0.217571	8	4	Glomus mosseae	Glomeraceae	Cucumis sativus	Forb	Cucurbitaceae	Nematode	Meloidogyne incognita	Sedentary endoparasitic
150	Zhang	2008	International	2.74	0.707107	0.258068	8	0.25	5.66	0.452548	0.0799555	8	0.16	694	384.666	0.554274	8	136	151	127.279	0.842909	8	45	64	8.48528	0.132583	8	3	53	11.3137	0.213466	8	4	Glomus versiforme	Glomeraceae	Cucumis sativus	Forb	Cucurbitaceae	Nematode	Meloidogyne incognita	Sedentary endoparasitic
151	Zhang	2009	International	0.25	0.15876	0.635042	5		2.15	0.919065	0.427472	5		156.014	59.8407	0.383559	5	26.7616	72.8826	48.3818	0.663833	5	21.637	58.4536	5.37886	0.0920193	5	2.4055	44.5017	4.84097	0.108782	5	2.16495	Glomus intraradices	Glomeraceae	Cucumis sativus	Forb	Cucurbitaceae	Nematode	Meloidogyne incognita	Sedentary endoparasitic
152	Jiao	2010	Chinese	2.59	1.64476	0.635042	5		4.77	2.03904	0.427472	5		42.03	13.7793		5		16.7	8.41574		5												Glomus mosseae	Glomeraceae	Lycopersicon esculentum	Forb	Solanaceae	Nematode	Meloidogyne incognita	Sedentary endoparasitic
153	Li	2003	Chinese	37.4088	10.8389	0.289741	8	3.83212	32.1168	9.29045	0.289271	8	3.28467	3.3123	1.07527	0.32463	8	0.380165	1.34615	0.701263	0.520941	8	0.247934											Glomus fasiculatum	Glomeraceae	Glycine max	Forb	Fabaceae	Nematode	Heterodera glycines	Migratory endoparasites
154	Li	2002b	Chinese	1.6	1.01607	0.635042	5		2.65	1.1328	0.427472	5		910	298.338		5		480	241.89		5		63.3	16.5509		5		61.5	16.7168		5		Glomus mosseae	Glomeraceae	Glycine max	Forb	Fabaceae	Nematode	Heterodera glycines	Migratory endoparasites
155	Li	2002b	Chinese	1.6	1.01607	0.635042	5		2.8	1.19692	0.427472	5		910	298.338		5		340	171.339		5		65.6	17.1523		5		63	17.1245		5		Glomus fasiculatum	Glomeraceae	Glycine max	Forb	Fabaceae	Nematode	Heterodera glycines	Migratory endoparasites
156	Li	2002b	Chinese	1.6	1.01607	0.635042	5		1.92	0.820747	0.427472	5		910	298.338		5		654	329.575		5		59.5	15.5573		5		52.3	14.2161		5		Glomys intraradices	Glomeraceae	Glycine max	Forb	Fabaceae	Nematode	Heterodera glycines	Migratory endoparasites
157	Li	2002b	Chinese	1.6	1.01607	0.635042	5		2.72	1.16272	0.427472	5		910	298.338		5		703	354.268		5		64.1	16.7601		5		59.1	16.0644		5		Gigaspora margarita	Non-Glomeraceae	Glycine max	Forb	Fabaceae	Nematode	Heterodera glycines	Migratory endoparasites
158	Li	2002b	Chinese	1.6	1.01607	0.635042	5		2.58	1.10288	0.427472	5		910	298.338		5		498	250.961		5		63.5	16.6032		5		55.9	15.1946		5		Glomus versiforme	Glomeraceae	Glycine max	Forb	Fabaceae	Nematode	Heterodera glycines	Migratory endoparasites
159	Li	2002a	Chinese	2.24	1.42249	0.635042	5		3.66	1.56455	0.427472	5		32800	10753.3		5		20000	10078.7		5		62	16.211		5		60.79	16.5238		5		Glomus versiforme	Glomeraceae	Vitis vinifera	Tree	Vitaceae	Nematode	Meloidogyne incognita	Sedentary endoparasitic
160	Li	2002a	Chinese	2.24	1.42249	0.635042	5		2.59	1.10715	0.427472	5		32800	10753.3		5		20100	10129.1		5		60.38	15.7874		5		58.96	16.0264		5		Gigaspora margarita	Non-Glomeraceae	Vitis vinifera	Tree	Vitaceae	Nematode	Meloidogyne incognita	Sedentary endoparasitic
161	Li	2002a	Chinese	2.24	1.42249	0.635042	5		2.7	1.15418	0.427472	5		32800	10753.3		5		22100	11137		5		61.52	16.0855		5		61.76	16.7875		5		Glomus mosseae	Glomeraceae	Vitis vinifera	Tree	Vitaceae	Nematode	Meloidogyne incognita	Sedentary endoparasitic
162	Abdalla	2000	International	1.59	1.00972	0.635042	30		1.79	0.765175	0.427472	30												43	11.2431		30		40	10.8727		30		Glomus mosseae	Glomeraceae	Arachis hypogaea	Forb	Fabaceae	Pathogen	Fusarium solani	Rotting
163	Abdalla	2000	International	1.29	0.819204	0.635042	30		2.14	0.914791	0.427472	30												43	11.2431		30		38	10.3291		30		Glomus mosseae	Glomeraceae	Arachis hypogaea	Forb	Fabaceae	Pathogen	Rhizoctonia solani	Rotting
164	Abdalla	2000	International	1.22	0.774751	0.635042	30		1.85	0.790824	0.427472	30												43	11.2431		30		35	9.51363		30		Glomus mosseae	Glomeraceae	Arachis hypogaea	Forb	Fabaceae	Pathogen	Mixed	Rotting
165	Abdalla	2000	International	3.75	2.38141	0.635042	30		6.48	2.77002	0.427472	30												64.7	16.917		30		59	16.0373		30		Glomus mosseae	Glomeraceae	Arachis hypogaea	Forb	Fabaceae	Pathogen	Fusarium solani	Rotting
166	Abdalla	2000	International	3.49	2.2163	0.635042	30		5.66	2.41949	0.427472	30												64.7	16.917		30		52	14.1345		30		Glomus mosseae	Glomeraceae	Arachis hypogaea	Forb	Fabaceae	Pathogen	Rhizoctonia solani	Rotting
167	Abdalla	2000	International	2.95	1.87337	0.635042	30		4.15	1.77401	0.427472	30												64.7	16.917		30		44	11.96		30		Glomus mosseae	Glomeraceae	Arachis hypogaea	Forb	Fabaceae	Pathogen	Mixed	Rotting
168	Abdalla	2000	International	6.66	4.22938	0.635042	30		8.79	3.75748	0.427472	30												80.3	20.9959		30		68	18.4836		30		Glomus mosseae	Glomeraceae	Arachis hypogaea	Forb	Fabaceae	Pathogen	Fusarium solani	Rotting
169	Abdalla	2000	International	6.89	4.37544	0.635042	30		9.08	3.88145	0.427472	30												80.3	20.9959		30		59.9	16.2819		30		Glomus mosseae	Glomeraceae	Arachis hypogaea	Forb	Fabaceae	Pathogen	Rhizoctonia solani	Rotting
170	Abdalla	2000	International	5.75	3.65149	0.635042	30		7.97	3.40695	0.427472	30												80.3	20.9959		30		50	13.5909		30		Glomus mosseae	Glomeraceae	Arachis hypogaea	Forb	Fabaceae	Pathogen	Mixed	Rotting
171	Abdalla	2000	International											64.0523	20.9992		30		15.6863	7.90489		30												Glomus mosseae	Glomeraceae	Arachis hypogaea	Forb	Fabaceae	Pathogen	Fusarium solani	Rotting
172	Abdalla	2000	International											41.8301	13.7137		30		19.6078	9.88111		30												Glomus mosseae	Glomeraceae	Arachis hypogaea	Forb	Fabaceae	Pathogen	Mixed	Rotting
173	Abdalla	2000	International											53.5948	17.5707		30		16.9935	8.56363		30												Glomus mosseae	Glomeraceae	Arachis hypogaea	Forb	Fabaceae	Pathogen	Fusarium solani	Rotting
174	Abdalla	2000	International											47.7124	15.6422		30		20.2614	10.2105		30												Glomus mosseae	Glomeraceae	Arachis hypogaea	Forb	Fabaceae	Pathogen	Mixed	Rotting
175	Abdalla	2000	International											61.4379	20.142		30		11.1111	5.5993		30												Glomus mosseae	Glomeraceae	Arachis hypogaea	Forb	Fabaceae	Pathogen	Fusarium solani	Rotting
176	Abdalla	2000	International											43.1373	14.1423		30		13.0719	6.58741		30												Glomus mosseae	Glomeraceae	Arachis hypogaea	Forb	Fabaceae	Pathogen	Mixed	Rotting
177	Abdalla	2000	International											54.2484	17.785		30		9.80392	4.94056		30												Glomus mosseae	Glomeraceae	Arachis hypogaea	Forb	Fabaceae	Pathogen	Fusarium solani	Rotting
178	Abdalla	2000	International											47.0588	15.4279		30		19.6078	9.88111		30												Glomus mosseae	Glomeraceae	Arachis hypogaea	Forb	Fabaceae	Pathogen	Mixed	Rotting
179	Abdalla	2000	International											88	28.8503		30		17.3333	8.7349		30												Glomus mosseae	Glomeraceae	Arachis hypogaea	Forb	Fabaceae	Pathogen	Rhizoctonia solani	Rotting
180	Abdalla	2000	International											59.3333	19.4521		30		24	12.0945		30												Glomus mosseae	Glomeraceae	Arachis hypogaea	Forb	Fabaceae	Pathogen	Mixed	Rotting
181	Abdalla	2000	International											41.3333	13.5509		30		14.6667	7.39107		30												Glomus mosseae	Glomeraceae	Arachis hypogaea	Forb	Fabaceae	Pathogen	Rhizoctonia solani	Rotting
182	Abdalla	2000	International											31.3333	10.2724		30		18.6667	9.40682		30												Glomus mosseae	Glomeraceae	Arachis hypogaea	Forb	Fabaceae	Pathogen	Mixed	Rotting
183	Abdalla	2000	International											74	24.2604		30		19.3333	9.74278		30												Glomus mosseae	Glomeraceae	Arachis hypogaea	Forb	Fabaceae	Pathogen	Rhizoctonia solani	Rotting
184	Abdalla	2000	International											61.3333	20.1078		30		19.3333	9.74278		30												Glomus mosseae	Glomeraceae	Arachis hypogaea	Forb	Fabaceae	Pathogen	Mixed	Rotting
185	Abdalla	2000	International											70	22.9491		30		24	12.0945		30												Glomus mosseae	Glomeraceae	Arachis hypogaea	Forb	Fabaceae	Pathogen	Rhizoctonia solani	Rotting
186	Abdalla	2000	International											69.3333	22.7305		30		27.3333	13.7743		30												Glomus mosseae	Glomeraceae	Arachis hypogaea	Forb	Fabaceae	Pathogen	Mixed	Rotting
187	Akhtar	2007	International	5.1	3.23871	0.635042	8		5.56	2.37675	0.427472	8												63	16.4725		8		59	16.0373		8		Glomus intraradices	Glomeraceae	Cicer arietinum	Forb	Fabaceae	Pathogen	Macrophomina phaseolina	Rotting
188	Akhtar	2008	International	5.14	3.26411	0.635042	5		5.52	2.35965	0.427472	5																						Glomus intraradices	Glomeraceae	Cicer arietinum	Forb	Fabaceae	Pathogen	Macrophomina phaseolina	Rotting
189	Akhtar	2008b	International	5.05085	0.227397	0.0450215	5	0.101695	5.49153	0.227397	0.0414087	5	0.101695											63.9456	3.80284	0.0594699	5	1.70068	55.7823	3.04227	0.0545382	5	1.36054	Glomus intraradices	Glomeraceae	Cicer arietinum	Forb	Fabaceae	Pathogen	Macrophomina phaseolina	Rotting
190	Akkopru	2005	International	1.3841	0.878961	0.635042	6		1.9779	0.845497	0.427472	6		46	15.0808		6		38	19.1496		6		84	21.9633		6		40	10.8727		6		Glomus intraradices	Glomeraceae	Solanum lycopersicum	Forb	Solanaceae	Pathogen	Fusarium oxysporum	Wilt
191	Attia	2004	International											2.7	0.885179		4		0.98	0.493858		4												Glomus sp	Glomeraceae	Lycopersicon esculentum	Forb	Solanaceae	Pathogen	Fusarium oxysporum	Rotting
192	Attia	2004	International											3.2	1.0491		4		1.14	0.574488		4												Glomus sp	Glomeraceae	Lycopersicon esculentum	Forb	Solanaceae	Pathogen	Fusarium oxysporum	Rotting
193	Basu	2009	International	0.02	0.00894427	0.447214	5	0.004	0.09	0.00223607	0.0248452	5	0.001											28.69	6.75293	0.235376	5	3.02	21.33	5.14296	0.241114	5	2.3	Glomus fasciculatum	Glomeraceae	Vigna radiata	Forb	Fabaceae	Pathogen	Fusarium oxysporum	Wilt
194	Basu	2009	International	0.05	0.067082	1.34164	5	0.03	0.1	0.0223607	0.223607	5	0.01											28.69	6.75293	0.235376	5	3.02	18.28	3.73423	0.20428	5	1.67	Glomus fasciculatum	Glomeraceae	Vigna radiata	Forb	Fabaceae	Pathogen	Rhizoctonia solani	Wilt
195	Behn	2008	International	100	32.143	0.32143	4		836.643	129.496	0.154781	4		8.01187	0.961424	0.12	4		2.67062	1.22849	0.46	4		45	11.766		4		57	15.4936		4		Glomus mosseae	Glomeraceae	Triticum aestivum	Grass	Poaceae	Pathogen	Gaeumannomyces graminis	Wilt
196	Berta	2005	International	0.736059	0.467428	0.635042	5		2.16357	0.924866	0.427472	5		14.5	4.75374		5		1.92	0.967559		5												Glomus mossae	Glomeraceae	Lycopersicon esculentum	Forb	Solanaceae	Pathogen	Rhizoctonia solani	Rotting
197	Boby	2003	International	0.03	0.0190512	0.635042	4		0.12	0.0512967	0.427472	3																						Glomus mossae	Glomeraceae	Coleus forskohlii	Forb	Lamiaceae	Pathogen	Fusarium chlamydosporum	Rotting
198	Calvet	1993	International	0.0659386	0.0444369	0.673913	9	0.0148123	0.108942	0.0444369	0.407895	9	0.0148123																					Glomus mossae	Glomeraceae	Tagetes erecta	Tree	Myrtaceae	Pathogen	Pythium ultimum	Wilt
199	Castellanos-Morales	2011	International											52.8959	17.3416		5		35.7919	18.0368		5		27.9245	7.30136		5		42.2642	11.4882		5		Glomus mosseae	Glomeraceae	Hordeum vulgare	Grass	Poaceae	Pathogen	Gaeumannomyces graminis	Rotting
200	Castellanos-Morales	2011	International											51.9457	17.0301		5		38.009	19.1542		5		16.6038	4.34135		5		33.2075	9.02641		5		Glomus mosseae	Glomeraceae	Hordeum vulgare	Grass	Poaceae	Pathogen	Gaeumannomyces graminis	Rotting
201	Castellanos-Morales	2011	International											48.7783	15.9917		5		35.7919	18.0368		5		6.79245	1.77601		5		41.8868	11.3856		5		Glomus mosseae	Glomeraceae	Hordeum vulgare	Grass	Poaceae	Pathogen	Gaeumannomyces graminis	Rotting
202	Castellanos-Morales	2011	International											64.9321	21.2876		5		48.7783	24.5812		5		23.0189	6.01869		5		55.0943	14.9756		5		Glomus mosseae	Glomeraceae	Hordeum vulgare	Grass	Poaceae	Pathogen	Gaeumannomyces graminis	Rotting
203	Chakraborty	2008	International	18	2.44912	0.136062	3	1.414	61	8.16489	0.133851	3	4.714											72.6	4.32147	0.0595243	3	2.495	55.6	2.94449	0.0529584	3	1.7	Glomus fasiculatum	Glomeraceae	Solanum melongena	Forb	Solanaceae	Pathogen	Fusarium solani	Rotting
204	Chakraborty	2008	International	47	29.847	0.635042	3	0.82	87	4.24352	0.0487761	3	2.45											67	2.82324	0.042138	3	1.63	58.3	4.31281	0.0739761	3	2.49	Glomus fasiculatum	Glomeraceae	Lycopersicon esculentum	Forb	Solanaceae	Pathogen	Fusarium solani	Rotting
205	Chandanie	2009	International											3.70191	1.21365		3		2.46223	1.24081		3												Glomus mosseae	Glomeraceae	Cucumis sativus	Forb	Cucurbitaceae	Pathogen	Rhizoctonia solani	Rotting
206	Chandanie	2009	International											3.05881	1.00281		3		1.55113	0.781672		3												Glomus mosseae	Glomeraceae	Cucumis sativus	Forb	Cucurbitaceae	Pathogen	Rhizoctonia solani	Rotting
207	Chandanie	2006	International											125.5	41.1444		3		46.6	23.4835		3												Glomus mosseae	Glomeraceae	Cucumis sativus	Forb	Cucurbitaceae	Pathogen	Colletotrichum orbiculare	Rotting
208	Chandanie	2006	International											123	40.3248		3		28	14.1102		3												Glomus mosseae	Glomeraceae	Cucumis sativus	Forb	Cucurbitaceae	Pathogen	Colletotrichum orbiculare	Rotting
209	Cimen	2009	International	183	116.213	0.635042	4		207.12	88.538	0.427472	4		8.95	2.9342		4		4.99	2.51464		4												Glomus intraradices	Glomeraceae	Capsicum annuum	Forb	Solanaceae	Pathogen	Phytophthora capsicileonian	Rotting
210	Cimen	2009	International	436.62	277.272	0.635042	4		510	218.011	0.427472	4		82.49	27.0438		4		75.38	37.9868		4												Glomus intraradices	Glomeraceae	Capsicum annuum	Forb	Solanaceae	Pathogen	Phytophthora capsicileonian	Rotting
211	Cordier	1996	International	2.82927	1.7967	0.635042	4		6.21951	2.65867	0.427472	4		36	11.8024		4		10.2	5.14016		4												Glomus mosseae	Glomeraceae	Solanum lycopersicum	Forb	Solanaceae	Pathogen	Phytophthora nicotianae	Rotting
212	D'Amelio	2011	International	5.03268	2.86451	0.569181	20	0.640523	11.2549	3.27372	0.290871	20	0.732026	4455	4230.64	0.949639	20	946	1207	1560.78	1.2931	20	349											Glomus mosseae	Glomeraceae	Chrysanthemum carinatum	Forb	Asteraceae	Pathogen	yellows phytoplasma	Wilt
213	Dar	1997	International	2.143	1.36089	0.635042	5		3.281	1.40254	0.427472	5		47	15.4087		5		13	6.55118		5		50.2	13.1257		5		36.4	9.89417		5		Glomus mossea	Glomeraceae	Phaseolus vulgari	Forb	Fabaceae	Pathogen	Fusarium solani	Rotting
214	Davis	1980	International	0.36	0.228615	0.635042	10		0.84	0.359077	0.427472	10		77	25.244		10		50	25.1968		10		54	14.1193		10		27	7.33908		10		Glomus fasiculatum	Glomeraceae	Citrus sinensis	Tree	Rutaceae	Pathogen	Phytophthora parasitica	Rotting
215	Davis	1981	International	2.56	1.62571	0.635042	10		6.4	2.73582	0.427472	10		46	15.0808		10		23	11.5905		10		76	19.8715		10		68	18.4836		10		Glomus fasiculatum	Glomeraceae	Citrus sinensis	Tree	Rutaceae	Pathogen	Phytophthora parasitica	Rotting
216	Davis	1981	International	1.7	1.07957	0.635042	10		3.49	1.49188	0.427472	10		88	28.8503		10		41	20.6614		10		76	19.8715		10		21	5.70818		10		Glomus fasiculatum	Glomeraceae	Citrus sinensis	Tree	Rutaceae	Pathogen	Phytophthora parasitica	Rotting
217	Davis	1981	International	3.8	2.41316	0.635042	10		9	3.84725	0.427472	10		68	22.2934		10		62	31.2441		10		84	21.9633		10		50	13.5909		10		Glomus fasiculatum	Glomeraceae	Citrus sinensis	Tree	Rutaceae	Pathogen	Phytophthora parasitica	Rotting
218	Davis	1981	International	3.8	2.41316	0.635042	10		7.4	3.16329	0.427472	10		68	22.2934		10		64	32.252		10		82	21.4403		10		40	10.8727		10		Glomus fasiculatum	Glomeraceae	Citrus sinensis	Tree	Rutaceae	Pathogen	Phytophthora parasitica	Rotting
219	Davis	1981	International	3.8	2.41316	0.635042	10		4.4	1.88088	0.427472	10		68	22.2934		10		56	28.2205		10		82	21.4403		10		47	12.7754		10		Glomus fasiculatum	Glomeraceae	Citrus sinensis	Tree	Rutaceae	Pathogen	Phytophthora parasitica	Rotting
220	Davis	1981	International	3.8	2.41316	0.635042	10		5.9	2.52209	0.427472	10		68	22.2934		10		65	32.7559		10		81	21.1789		10		46	12.5036		10		Glomus constrictum	Glomeraceae	Citrus sinensis	Tree	Rutaceae	Pathogen	Phytophthora parasitica	Rotting
221	Davis	1981	International	3.8	2.41316	0.635042	10		7	2.99231	0.427472	10		68	22.2934		10		51	25.7008		10		86	22.4862		10		44	11.96		10		Glomus mosseae	Glomeraceae	Citrus sinensis	Tree	Rutaceae	Pathogen	Phytophthora parasitica	Rotting
222	Davis	1981	International	3.8	2.41316	0.635042	10		7.8	3.33428	0.427472	10		68	22.2934		10		71	35.7795		10		81	21.1789		10		45	12.2318		10		Gigaspora margarita	Non-Glomeraceae	Citrus sinensis	Tree	Rutaceae	Pathogen	Phytophthora parasitica	Rotting
223	Davis	1981	International	3.8	2.41316	0.635042	10		5	2.13736	0.427472	10		68	22.2934		10		66	33.2598		10		81	21.1789		10		44	11.96		10		Sclerocystis sinuosa	Non-Glomeraceae	Citrus sinensis	Tree	Rutaceae	Pathogen	Phytophthora parasitica	Rotting
224	Davis	1981	International	5.1	3.23871	0.635042	10		7.5	3.20604	0.427472	10		57	18.6871		10		53	26.7087		10		85	22.2247		10		49	13.3191		10		Glomus fasiculatum	Glomeraceae	Poncirus trifoliat	Tree	Rutaceae	Pathogen	Phytophthora parasitica	Rotting
225	Davis	1981	International	5.1	3.23871	0.635042	10		5.7	2.43659	0.427472	10		57	18.6871		10		61	30.7401		10		79	20.6559		10		48	13.0473		10		Glomus fasiculatum	Glomeraceae	Poncirus trifoliat	Tree	Rutaceae	Pathogen	Phytophthora parasitica	Rotting
226	Davis	1981	International	5.1	3.23871	0.635042	10		5.9	2.52209	0.427472	10		57	18.6871		10		61	30.7401		10		88	23.0092		10		48	13.0473		10		Glomus fasiculatum	Glomeraceae	Poncirus trifoliat	Tree	Rutaceae	Pathogen	Phytophthora parasitica	Rotting
227	Davis	1981	International	5.1	3.23871	0.635042	10		5.9	2.52209	0.427472	10		57	18.6871		10		65	32.7559		10		90	23.5321		10		39	10.6009		10		Glomus constrictum	Glomeraceae	Poncirus trifoliat	Tree	Rutaceae	Pathogen	Phytophthora parasitica	Rotting
228	Davis	1981	International	5.1	3.23871	0.635042	10		9.7	4.14648	0.427472	10		57	18.6871		10		42	21.1653		10		86	22.4862		10		53	14.4063		10		Glomus mosseae	Glomeraceae	Poncirus trifoliat	Tree	Rutaceae	Pathogen	Phytophthora parasitica	Rotting
229	Davis	1981	International	5.1	3.23871	0.635042	10		8.8	3.76176	0.427472	10		57	18.6871		10		71	35.7795		10		86	22.4862		10		27	7.33908		10		Gigaspora margarita	Non-Glomeraceae	Poncirus trifoliat	Tree	Rutaceae	Pathogen	Phytophthora parasitica	Rotting
230	Davis	1981	International	5.1	3.23871	0.635042	10		5.8	2.47934	0.427472	10		57	18.6871		10		73	36.7874		10		83	21.7018		10		38	10.3291		10		Sclerocystis sinuosa	Non-Glomeraceae	Poncirus trifoliat	Tree	Rutaceae	Pathogen	Phytophthora parasitica	Rotting
231	Davis	1979	International	4.3	2.73068	0.635042	10		5.9	2.52209	0.427472	10		46.4	15.212		10		69.8	35.1748		10		72.2	18.878		10		74	20.1145		10		Glomus fasiculatum	Glomeraceae	Gossypium hirsutum	Forb	Malvaceae	Pathogen	Verticillium dahliae	Wilt
232	Declerck	2002	International	1.2	0.76205	0.635042	8		4.6	1.96637	0.427472	8		56.9534	22.7085	0.398721	8	8.02867	28.853	17.0314	0.59028	8	6.02151	46	12.0275		8		40	10.8727		8		Glomus sp	Glomeraceae	Musa acuminata	Grass	Poaceae	Pathogen	Cylindrocladium spathiphylli	Rotting
233	Declerck	2002	International	1.2	0.76205	0.635042	8		4	1.70989	0.427472	8		56.9534	22.7085	0.398721	8	8.02867	36.8817	11.3543	0.307856	8	4.01434	51	13.3348		8		43	11.6882		8		Glomus proliferum	Glomeraceae	Musa acuminata	Grass	Poaceae	Pathogen	Cylindrocladium spathiphylli	Rotting
234	Declerck	2002	International	1.2	0.76205	0.635042	8		3.5	1.49615	0.427472	8		56.9534	22.7085	0.398721	8	8.02867	37.8853	14.1928	0.374626	8	5.01792	51	13.3348		8		39	10.6009		8		Glomus intraradices	Glomeraceae	Musa acuminata	Grass	Poaceae	Pathogen	Cylindrocladium spathiphylli	Rotting
235	Declerck	2002	International	1.2	0.76205	0.635042	8		2.9	1.23967	0.427472	8		56.9534	22.7085	0.398721	8	8.02867	40.1434	13.4832	0.335876	8	4.76703	64	16.7339		8		45	12.2318		8		Glomus versiforme	Glomeraceae	Musa acuminata	Grass	Poaceae	Pathogen	Cylindrocladium spathiphylli	Rotting
236	Filion	2003	International	1.25	0.173205	0.138564	3	0.1	1.16	0.0866025	0.0746574	3	0.05	2196.29	164.246	0.0747835	3	94.8276	812.711	44.7944	0.0551173	3	25.8621	86.7	1.21244	0.0139843	3	0.7	92.7	1.21244	0.0130791	3	0.7	Glomus intraradices	Glomeraceae	Phaseolus vulgaris	Forb	Fabaceae	Pathogen	Fusarium solani	Rotting
237	Fritz	2006	International											3.16	0.68	0.21519	4	0.34	1.64	0.68	0.414634	4	0.34											Glomus intraradices	Glomeraceae	Solanum lycopersicum	Forb	Solanaceae	Pathogen	Alternaria solani	Rotting
238	Fritz	2006	International											4.42	1.44907		4		1.35	0.680315		4												Glomus intraradices	Glomeraceae	Solanum lycopersicum	Forb	Solanaceae	Pathogen	Alternaria solani	Rotting
239	Fritz	2006	International											5.39713	0.688995	0.12766	4	0.344498	0.574163	0.688995	1.2	4	0.344498											Glomus intraradices	Glomeraceae	Solanum lycopersicum	Forb	Solanaceae	Pathogen	Alternaria solani	Rotting
240	Gallou	2011	International											4.3	0.6	0.139535	4	0.3	3.2	0.6	0.1875	4	0.3	40.1	10.4849		4		35.9	9.75826		4		Glomus sp. MUCL 41833	Glomeraceae	Solanum tuberosum	Forb	Solanaceae	Pathogen	Phytophthora infestans	Rotting
241	Gallou	2011	International											4.3	0.8	0.186047	4	0.4	2.9	1	0.344828	4	0.5	37.6	9.83118		4		45.1	12.259		4		Glomus sp. MUCL 41834	Glomeraceae	Solanum tuberosum	Forb	Solanaceae	Pathogen	Phytophthora infestans	Rotting
242	Gallou	2011	International											6.8	0.4	0.0588235	4	0.2	6.4	0.2	0.03125	4	0.1	43.2	11.2954		4		39.1	10.6281		4		Glomus sp. MUCL 41835	Glomeraceae	Solanum tuberosum	Forb	Solanaceae	Pathogen	Phytophthora infestans	Rotting
243	Garmendia	2004	International	0.71	0.45088	0.635042	4		0.86	0.367626	0.427472	4		11.22	3.67841		8		7.4	3.72913		8												Glomus deserticola	Glomeraceae	Capsicum annuum	Forb	Solanaceae	Pathogen	Verticillium dahliae	Wilt
244	Garmendia	2004b	International	4.32	2.74338	0.635042	6		4.62	1.97492	0.427472	6		71.89	23.5687		6		77.23	38.919		6												Glomus deserticola	Glomeraceae	Capsicum annuum	Forb	Solanaceae	Pathogen	Verticillium dahliae	Wilt
245	Garmendia	2004b	International	4.32	2.74338	0.635042	6		3.53	1.50898	0.427472	6		71.89	23.5687		6		83.65	42.1543		6												Glomus intraradices	Glomeraceae	Capsicum annuum	Forb	Solanaceae	Pathogen	Verticillium dahliae	Wilt
246	Garmendia	2004b	International	4.32	2.74338	0.635042	6		3.74	1.59875	0.427472	6		71.89	23.5687		6		72.75	36.6614		6												Glomus mosseae	Glomeraceae	Capsicum annuum	Forb	Solanaceae	Pathogen	Verticillium dahliae	Wilt
247	Gernns	2001	International	1.42	0.15	0.105634	32		1.51	0.09	0.0596026	32		184	130	0.706522	10		543	281	0.517495	10												Glomus etunicatum	Non-Glomeraceae	Hordeum vulgare	Grass	Poaceae	Pathogen	Erysiphe graminis	Wilt
248	Gernns	2001	International	0.88	0.27	0.306818	18		1.3	0.07	0.0538462	18		470	210	0.446809	12		1323	358	0.270597	12												Glomus etunicatum	Non-Glomeraceae	Hordeum vulgare	Grass	Poaceae	Pathogen	Erysiphe graminis	Wilt
249	Hu	2010	International	0.414508	0.331606	0.8	4	0.165803	0.746114	0.165803	0.222222	4	0.0829016																					Glomus caledoneum	Glomeraceae	Cucumis sativus	Forb	Cucurbitaceae	Pathogen	Fusarium oxysporum	Wilt
250	Hwang	1993	International	1.72	1.09227	0.635042	10		4.74	2.02622	0.427472	10																						Glomus fasiculatum	Glomeraceae	Onobrychis viciifolia	Forb	Fabaceae	Pathogen	Pythium irregulare	Rotting
251	Hwang	1993	International	1.72	1.09227	0.635042	10		4.89	2.09034	0.427472	10																						Glomus intraradices	Glomeraceae	Onobrychis viciifolia	Forb	Fabaceae	Pathogen	Pythium irregulare	Rotting
252	Hwang	1993	International	1.41	0.895409	0.635042	10		4.59	1.9621	0.427472	10																						Glomus fasiculatum	Glomeraceae	Onobrychis viciifolia	Forb	Fabaceae	Pathogen	Pythium paroecandrum	Rotting
253	Hwang	1993	International	1.41	0.895409	0.635042	10		4.36	1.86378	0.427472	10																						Glomus intraradices	Glomeraceae	Onobrychis viciifolia	Forb	Fabaceae	Pathogen	Pythium paroecandrum	Rotting
254	Hwang	1992	International											47.6624	15.6258		12		19.2722	9.71196		12		90	23.5321		12		72	19.5709		12		Glomus spp	Glomeraceae	Medicago sativa	Forb	Fabaceae	Pathogen	Verticilium albo-atrum	Wilt
255	Hwang	1992	International											47.6624	15.6258		12		28.4427	14.3333		12		53	13.8578		12		27	7.33908		12		Glomus mosseae	Glomeraceae	Medicago sativa	Forb	Fabaceae	Pathogen	Verticilium albo-atrum	Wilt
256	Hwang	1992	International											47.6624	15.6258		12		23.2547	11.7189		12		63	16.4725		12		34	9.24181		12		Glomus fasiculatum	Glomeraceae	Medicago sativa	Forb	Fabaceae	Pathogen	Verticilium albo-atrum	Wilt
257	Hwang	1992	International											37.7729	12.3836		12		16.1751	8.15123		12		92	24.055		12		70	19.0273		12		Glomus spp	Glomeraceae	Medicago sativa	Forb	Fabaceae	Pathogen	Fusarium oxysporum	Wilt
258	Hwang	1992	International											37.7729	12.3836		12		21.2439	10.7056		12		55	14.3807		12		25	6.79545		12		Glomus mosseae	Glomeraceae	Medicago sativa	Forb	Fabaceae	Pathogen	Fusarium oxysporum	Wilt
259	Hwang	1992	International											37.7729	12.3836		12		26.4417	13.3249		12		64	16.7339		12		34	9.24181		12		Glomus fasiculatum	Glomeraceae	Medicago sativa	Forb	Fabaceae	Pathogen	Fusarium oxysporum	Wilt
260	Jaiti	2007	International	26.1161	4.94106	0.189196	10	1.5625	39.0625	3.52933	0.0903508	10	1.11607	72.22	23.6769		10		22.22	11.1975		10		72.8111	20.4018	0.280202	10	6.45161	70.5069	13.1154	0.186016	10	4.14747	Glomus monosporus	Glomeraceae	Phoenix dactylifera	Tree	Arecaceae	Pathogen	Fusarium oxysporum f. sp. albedinis	Wilt
261	Jaiti	2007	International	26.1161	4.94106	0.189196	10	1.5625	34.5982	2.1176	0.0612054	10	0.669643	72.22	23.6769		10		22.22	11.1975		10		84.7926	2.91454	0.0343726	10	0.921659	70.0461	30.6027	0.436894	10	9.67742	Glomus clarum	Glomeraceae	Phoenix dactylifera	Tree	Arecaceae	Pathogen	Fusarium oxysporum f. sp. albedinis	Wilt
262	Jaiti	2007	International	26.1161	4.94106	0.189196	10	1.5625	27.2321	7.05866	0.259203	10	2.23214	72.22	23.6769		10		66.66	33.5924		10		66.3594	16.03	0.241563	10	5.06912	63.5945	24.7736	0.389556	10	7.8341	Glomus deserticola	Glomeraceae	Phoenix dactylifera	Tree	Arecaceae	Pathogen	Fusarium oxysporum f. sp. albedinis	Wilt
263	Kasiamdari	2002	International	0.18	0.0173205	0.096225	3	0.01	0.36	0.103923	0.288675	3	0.06	41.7	13.6711		3		25	12.5984		3		52.7273	14.9586	0.283698	3	8.63636	57.2727	4.72377	0.0824786	3	2.72727	Glomus coronatum	Glomeraceae	Vigna radiata	Forb	Fabaceae	Pathogen	Rhizoctonia sp. (BNR)	Rotting
264	Kasiamdari	2002	International	0.09	0.0173205	0.19245	3	0.01	0.26	0.034641	0.133235	3	0.02	75	24.5883		3		58.3	29.3795		3		52.7273	14.9586	0.283698	3	8.63636	60.9091	7.08566	0.116332	3	4.09091	Glomus coronatum	Glomeraceae	Vigna radiata	Forb	Fabaceae	Pathogen	Rhizoctonia solani	Rotting
265	Khaosaad	2007	International	1.04748	0.665195	0.635042	5		1.10288	0.47145	0.427472	5		33.5307	10.9929		5		14.2362	7.17417		5												Glomus mosseae	Glomeraceae	Hordeum vulgare	Grass	Poaceae	Pathogen	Gaeumannomyces graminis var. tritici (Ggt)	Rotting
266	Khatun & Chatterjee	2011	International	19.7	0.737902	0.037457	5	0.33	32.18	1.07331	0.0333534	5	0.48	37.34	1.52053	0.0407211	5	0.68	21.45	1.60997	0.0750568	5	0.72	98.3193	6.76458	0.0688021	5	3.02521	78.1513	5.63715	0.0721312	5	2.52101	Glomus fasciculatum	Glomeraceae	Coleus forskohlii	Forb	Lamiaceae	Pathogen	Fusarium oxysporum	Wilt
267	Kobra	2011	International											37.4468	9.21304	0.24603	3	5.31915	12.1277	9.21304	0.759671	3	5.31915											Glomus etunicatum	Non-Glomeraceae	Gossypium hirsutum	Forb	Malvaceae	Pathogen	Verticillium dahliae	Wilt
268	Kobra	2011	International											37.4468	9.21304	0.24603	3	5.31915	28.7234	12.5297	0.43622	3	7.23404											Glomus intraradices	Glomeraceae	Gossypium hirsutum	Forb	Malvaceae	Pathogen	Verticillium dahliae	Wilt
269	Kobra	2011	International											37.4468	9.21304	0.24603	3	5.31915	28.2979	11.4242	0.403711	3	6.59574											Glomus versiforme	Non-Glomeraceae	Gossypium hirsutum	Forb	Malvaceae	Pathogen	Verticillium dahliae	Wilt
270	Krishna	2010	International	25.4	16.1301	0.635042	15		90.8	38.8145	0.427472	15		603.65	197.903		15		65.54	33.028		15												Sclerocystis dussi	Glomeraceae	Malus domestica	Tree	Rosaceae	Pathogen	Botryosphaeria	Rotting
271	Krishna	2010	International	25.4	16.1301	0.635042	15		71.1	30.3933	0.427472	15		603.65	197.903		15		129.93	65.4765		15												Glomus intraradices	Glomeraceae	Malus domestica	Tree	Rosaceae	Pathogen	Botryosphaeria	Rotting
272	Krishna	2010	International	25.4	16.1301	0.635042	15		88.3	37.7458	0.427472	15		603.65	197.903		15		77.99	39.302		15												Glomus fasciculatum	Glomeraceae	Malus domestica	Tree	Rosaceae	Pathogen	Botryosphaeria	Rotting
273	Krishna	2010	International	25.4	16.1301	0.635042	15		61	26.0758	0.427472	15		603.65	197.903		15		187.65	94.5637		15												Glomus bagyaraji	Glomeraceae	Malus domestica	Tree	Rosaceae	Pathogen	Botryosphaeria	Rotting
274	Krishna	2010	International	25.4	16.1301	0.635042	15		40.4	17.2699	0.427472	15		603.65	197.903		15		296.68	149.508		15												Glomus leptotichum	Non-Glomeraceae	Malus domestica	Tree	Rosaceae	Pathogen	Botryosphaeria	Rotting
275	Krishna	2010	International	25.4	16.1301	0.635042	15		45.9	19.621	0.427472	15		603.65	197.903		15		227.4	114.595		15												Glomus monosporum	Glomeraceae	Malus domestica	Tree	Rosaceae	Pathogen	Botryosphaeria	Rotting
276	Krishna	2010	International	25.4	16.1301	0.635042	15		61.3	26.204	0.427472	15		603.65	197.903		15		170.25	85.7952		15												Gigaspora margarita	Non-Glomeraceae	Malus domestica	Tree	Rosaceae	Pathogen	Botryosphaeria	Rotting
277	Larsen	2003	International	0.39	0.247666	0.635042	4		0.5	0.213736	0.427472	4		10600	1300	0.122642	4	650	7100	2800	0.394366	4	1400	13.8186	1.53258	0.110907	4	0.766291	7.81607	2.68202	0.343142	4	1.34101	Glomus intraradices	Glomeraceae	Cucumis sativus	Forb	Cucurbitaceae	Pathogen	Pythium ultimum	Wilt
278	Larsen & Yohalem	2004	International	2.26	1.43519	0.635042	5		2.06	0.880593	0.427472	5		58.9474	11.6303	0.1973	5	5.20124	44.4272	20.8377	0.469029	5	9.31889	12.5	3.26835		5		16.8	4.56654		5		Glomus intraradices	Glomeraceae	Cucumis sativus	Forb	Cucurbitaceae	Pathogen	Podosphaera xanthii	Wilt
279	Lingua	2002	International	10.0372	1.48699	0.148148	8		20.632	1.48699	0.0720721	8												25.4	11.6276	0.457778	5	5.2	23.7	7.15542	0.301916	5	3.2	Glomus mosseae	Glomeraceae	Lycopersicon esculentum	Forb	Solanaceae	Pathogen	Phytoplasma	Wilt
280	Liu	1995	International	145	92.081	0.635042	5		172	73.5252	0.427472	5		43.3	14.1956		5		23.3	11.7417		5												Glomus hoi	Glomeraceae	Gossypium hirsutum	Forb	Malvaceae	Pathogen	Verticillium dahliae	Wilt
281	Liu	1995	International	145	92.081	0.635042	5		178	76.0901	0.427472	5		43.3	14.1956		5		23.3	11.7417		5												Glomus mosseae	Glomeraceae	Gossypium hirsutum	Forb	Malvaceae	Pathogen	Verticillium dahliae	Wilt
282	Liu	1995	International	145	92.081	0.635042	5		189	80.7923	0.427472	5		43.3	14.1956		5		20	10.0787		5												Glomus versiforme	Glomeraceae	Gossypium hirsutum	Forb	Malvaceae	Pathogen	Verticillium dahliae	Wilt
283	Liu	1995	International	151	95.8913	0.635042	5		180	76.945	0.427472	5		35.5	11.6385		5		23.3	11.7417		5												Glomus hoi	Glomeraceae	Gossypium hirsutum	Forb	Malvaceae	Pathogen	Verticillium dahliae	Wilt
284	Liu	1995	International	151	95.8913	0.635042	5		181	77.3725	0.427472	5		35.5	11.6385		5		23.3	11.7417		5												Glomus mosseae	Glomeraceae	Gossypium hirsutum	Forb	Malvaceae	Pathogen	Verticillium dahliae	Wilt
285	Liu	1995	International	151	95.8913	0.635042	5		190	81.2197	0.427472	5		35.5	11.6385		5		16.7	8.41574		5												Glomus versiforme	Glomeraceae	Gossypium hirsutum	Forb	Malvaceae	Pathogen	Verticillium dahliae	Wilt
286	Liu	1995b	International	43.7	27.7513	0.635042	5		56.7	24.2377	0.427472	5		65.2	21.3754		5		38.7	19.5024		5												Glomus mosseae	Glomeraceae	Gossypium hirsutum	Forb	Malvaceae	Pathogen	Verticillium dahliae	Wilt
287	Liu	1995b	International	43.7	27.7513	0.635042	5		51.8	22.1431	0.427472	5		65.2	21.3754		5		34.2	17.2346		5												Glomus versiforme	Glomeraceae	Gossypium hirsutum	Forb	Malvaceae	Pathogen	Verticillium dahliae	Wilt
288	Liu	1995b	International	43.7	27.7513	0.635042	5		55.6	23.7675	0.427472	5		65.2	21.3754		5		41.6	20.9638		5												Scerocystis sinuosa	Glomeraceae	Gossypium hirsutum	Forb	Malvaceae	Pathogen	Verticillium dahliae	Wilt
289	Liu	1995b	International	42.5	26.9893	0.635042	5		59.6	25.4773	0.427472	5		61.2	20.064		5		33	16.6299		5												Glomus mosseae	Glomeraceae	Gossypium hirsutum	Forb	Malvaceae	Pathogen	Verticillium dahliae	Wilt
290	Liu	1995b	International	42.5	26.9893	0.635042	5		55.6	23.7675	0.427472	5		61.2	20.064		5		30.8	15.5213		5												Glomus versiforme	Glomeraceae	Gossypium hirsutum	Forb	Malvaceae	Pathogen	Verticillium dahliae	Wilt
291	Liu	1995b	International	42.5	26.9893	0.635042	5		47.5	20.3049	0.427472	5		61.2	20.064		5		38.7	19.5024		5												Scerocystis sinuosa	Glomeraceae	Gossypium hirsutum	Forb	Malvaceae	Pathogen	Verticillium dahliae	Wilt
292	Martinez-Medina	2009	International											83.4356	0.920245	0.0110294	5		66.8712	9.81595	0.146789	5												Glomus constrictum	Glomeraceae	Cucumis melo	Forb	Cucurbitaceae	Pathogen	Fusarium oxysporum	Wilt
293	Martinez-Medina	2009	International											83.4356	0.920245	0.0110294	5		50.3067	0.613497	0.0121951	5												Glomus mosseae	Glomeraceae	Cucumis melo	Forb	Cucurbitaceae	Pathogen	Fusarium oxysporum	Wilt
294	Martinez-Medina	2009	International											83.4356	0.920245	0.0110294	5		77.9141	7.05521	0.0905512	5												Glomus claroideum	Non-Glomeraceae	Cucumis melo	Forb	Cucurbitaceae	Pathogen	Fusarium oxysporum	Wilt
295	Martinez-Medina	2009	International											83.4356	0.920245	0.0110294	5		66.8712	1.22699	0.0183486	5												Glomus intraradices	Glomeraceae	Cucumis melo	Forb	Cucurbitaceae	Pathogen	Fusarium oxysporum	Wilt
296	Martinez-Medina	2011	International											87.6011	32.7823	0.374223	8	11.5903	62.2642	28.208	0.453038	8	9.97305											Glomus constrictum	Glomeraceae	Cucumis melo	Forb	Cucurbitaceae	Pathogen	Fusarium oxysporum	Wilt
297	Martinez-Medina	2011	International											87.6011	32.7823	0.374223	8	11.5903	37.7358	15.2476	0.404061	8	5.39084											Glomus mosseae	Glomeraceae	Cucumis melo	Forb	Cucurbitaceae	Pathogen	Fusarium oxysporum	Wilt
298	Martinez-Medina	2011	International											87.6011	32.7823	0.374223	8	11.5903	62.8032	28.208	0.449149	8	9.97305											Glomus claroideum	Non-Glomeraceae	Cucumis melo	Forb	Cucurbitaceae	Pathogen	Fusarium oxysporum	Wilt
299	Martinez-Medina	2011	International											87.6011	32.7823	0.374223	8	11.5903	50.1348	16.7723	0.334545	8	5.92992											Glomus intraradices	Glomeraceae	Cucumis melo	Forb	Cucurbitaceae	Pathogen	Fusarium oxysporum	Wilt
300	Neeraj & Singh	2010	International	6.48	0.72	0.111111	15		9.93	1.01	0.101712	15												66	17.2569		15		68	18.4836		15		Glomus mosseae	Glomeraceae	Cyamopsis tetragonoloba	Forb	Fabaceae	Pathogen	Macrophomina phaseolina	Rotting
301	Neeraj & Singh	2010	International	6.48	0.72	0.111111	15		9.69	1.04	0.107327	15												64	16.7339		15		68	18.4836		15		Glomus sinuosum	Glomeraceae	Cyamopsis tetragonoloba	Forb	Fabaceae	Pathogen	Macrophomina phaseolina	Rotting
302	Neeraj & Singh	2010	International	6.48	0.72	0.111111	15		9.79	0.46	0.0469867	15												63	16.4725		15		67	18.2118		15		Scutellospora erythropa	Non-Glomeraceae	Cyamopsis tetragonoloba	Forb	Fabaceae	Pathogen	Macrophomina phaseolina	Rotting
303	Neeraj & Singh	2011	International	2.15	1.36534	0.635042	3		3.87	1.65432	0.427472	3		74.5	24.4244		3		35.2	17.7386		3		62	16.211		3		69	18.7554		3		Glomus sinuosum	Glomeraceae	Phaseolus vulgaris	Forb	Fabaceae	Pathogen	Rhizoctonia solani	Rotting
304	Neeraj & Singh	2011	International	2.15	1.36534	0.635042	3		3.79	1.62012	0.427472	3		74.5	24.4244		3		36.85	18.5701		3		63	16.4725		3		65	17.6682		3		Gigaspora albida	Non-Glomeraceae	Phaseolus vulgaris	Forb	Fabaceae	Pathogen	Rhizoctonia solani	Rotting
305	Newsham	1995	International											4.40639	1.44461		16		2.76256	1.39215		16		17.7043	9.27273	0.523754	16	2.31818	17.3671	15.8254	0.911232	16	3.95636	Glomus sp	Glomeraceae	Vulpia ciliat	Grass	Poaceae	Pathogen	Fusarium oxysporu	Rotting
306	Nogales	2009	International	3.7	2.34965	0.635042	3		4.54	1.94072	0.427472	3		68	22.2934		3		31	15.622		3		70	17.3205	0.247436	12	5	76	2.77128	0.0364642	12	0.8	Glomus intraradices	Glomeraceae	Vitis berlandieri	Tree	Vitaceae	Pathogen	Armillaria mellea	Rotting
307	Nogales	2010	International	0.608	0.386105	0.635042	10		0.822	0.351382	0.427472	10		78.9	25.8669		10		80.1	40.3653		10		26	6.79816		10		10	2.71818		10		Glomus intraradices	Glomeraceae	Vitis berlandieri	Tree	Vitaceae	Pathogen	Armillaria mellea	Rotting
308	Norman	1996	International	1.05262	0.343938	0.326745	20	0.0769068	1.54309	0.312883	0.202764	20	0.0699627	73.913	11.6664	0.15784	20	2.6087	30.8696	15.5553	0.503903	20	3.47826											Glomus fasiculatum	Glomeraceae	Fragaria x ananassa	Forb	Rosaceae	Pathogen	Phytophthora fragariae	Rotting
309	Norman	1996	International	1.05262	0.343938	0.326745	20	0.0769068	1.13151	0.312737	0.276388	20	0.0699301	73.913	11.6664	0.15784	20	2.6087	33.4783	11.6664	0.348478	20	2.6087											Glomus etunicatum	Non-Glomeraceae	Fragaria x ananassa	Forb	Rosaceae	Pathogen	Phytophthora fragariae	Rotting
310	Ozgonen	2010	International											47.6	15.6054		4		16.7	8.41574		4												Glomus clarum	Glomeraceae	Arachis hypogeae	Forb	Fabaceae	Pathogen	Sclerotium rolfsii Sacc	Rotting
311	Ozgonen	2010	International											47.6	15.6054		4		15.5	7.81102		4												Glomus caledonium	Glomeraceae	Arachis hypogeae	Forb	Fabaceae	Pathogen	Sclerotium rolfsii Sacc	Rotting
312	Ozgonen	2010	International											47.6	15.6054		4		29.8	15.0173		4												Glomus etunicatum	Non-Glomeraceae	Arachis hypogeae	Forb	Fabaceae	Pathogen	Sclerotium rolfsii Sacc	Rotting
313	Ozgonen	2010	International											47.6	15.6054		4		17.6	8.86929		4												Glomus fasiculatum	Glomeraceae	Arachis hypogeae	Forb	Fabaceae	Pathogen	Sclerotium rolfsii Sacc	Rotting
314	Ozgonen	2010	International											47.6	15.6054		4		20.2	10.1795		4												Glomus mosseae	Glomeraceae	Arachis hypogeae	Forb	Fabaceae	Pathogen	Sclerotium rolfsii Sacc	Rotting
315	Ozgonen	2010	International											47.6	15.6054		4		27.2	13.7071		4												Gigaspora margarita	Non-Glomeraceae	Arachis hypogeae	Forb	Fabaceae	Pathogen	Sclerotium rolfsii Sacc	Rotting
316	Ozgonen & Erkilic	2007	International											64	20.982		4		5.3	2.67087		4												Glomus mosseae	Glomeraceae	Capsicum annuum	Forb	Solanaceae	Pathogen	Phytophthora capsici	Rotting
317	Ozgonen & Erkilic	2007	International											64	20.982		4		24	12.0945		4												Glomus etunicatum	Non-Glomeraceae	Capsicum annuum	Forb	Solanaceae	Pathogen	Phytophthora capsici	Rotting
318	Ozgonen & Erkilic	2007	International											64	20.982		4		30.7	15.4709		4												Glomus fasiculatum	Glomeraceae	Capsicum annuum	Forb	Solanaceae	Pathogen	Phytophthora capsici	Rotting
319	Ozgonen & Erkilic	2007	International											64	20.982		4		16	8.06299		4												Gigaspora margarita	Non-Glomeraceae	Capsicum annuum	Forb	Solanaceae	Pathogen	Phytophthora capsici	Rotting
320	Petit & Gubler	2006	International	0.43	0.273068	0.635042	7		0.61	0.260758	0.427472	7		50	16.3922		7		30	15.1181		7		48.3	12.6289		7		54.5	14.8141		7		Glomus intraradices	Glomeraceae	Vitis rupestris	Tree	Vitaceae	Pathogen	Cylindrocarpon macrodidymum	Rotting
321	Rabie	1998	International	1.2	0.76205	0.635042	5		2.4	1.02593	0.427472	5		83	27.211		5		32.3	16.2772		5		20.7	5.41238		5		14.3	3.887		5		Glomus mosseae	Glomeraceae	Vicia faba	Forb	Fabaceae	Pathogen	Bothytis fabae	Rotting
322	Ren	2010	International	44.3478	6.64032	0.149733	4	3.32016	46.4822	3.79447	0.0816327	4	1.89723	1313.29	371.305	0.282728	4		60.1382	50.6325	0.841935	4		76.7932	11.8143	0.153846	4	5.90717	48.9451	21.097	0.431034	4	10.5485	Glomus etunicatum	Non-Glomeraceae	Lycopersicon esculentum	Forb	Solanaceae	Pathogen	Fusarium oxysporum	Wilt
323	Siddiqui & Akhtar	2007a	International	5.0261	0.20863	0.0415094	8	0.0737619	5.39404	0.347717	0.0644632	8	0.122937											61.7978	6.99162	0.113137	8	2.47191	55.7303	5.08481	0.0912396	8	1.79775	Glomus intraradices	Glomeraceae	Cicer arietinum	Forb	Fabaceae	Pathogen	Macrophomina phaseolina	Rotting
324	Siddiqui & Akhtar	1995b	International	6.31	4.00711	0.635042	5		7.52	3.21459	0.427472	5		3	0.983532		5		2	1.00787		5		57	14.9037		5		46	12.5036		5		Gigaspora margarita	Non-Glomeraceae	Cajanus cajan	Forb	Fabaceae	Pathogen	Fusarium udum	Wilt
325	Sikes	2009	International	2.01238	1.27795	0.635042	10		2.26006	0.966114	0.427472	10		12.3183	4.03849		10		13.9792	7.04465		10												Glomus intraradices	Glomeraceae	Allium cepa	Forb	Amaryllidaceae	Pathogen	Fusarium oxysporum	Wilt
326	Sikes	2009	International	2.01238	1.27795	0.635042	10		2.8483	1.21757	0.427472	10		12.3183	4.03849		10		11.6263	5.85892		10												Glomus etunicatum	Non-Glomeraceae	Allium cepa	Forb	Amaryllidaceae	Pathogen	Fusarium oxysporum	Wilt
327	Sikes	2009	International	2.01238	1.27795	0.635042	10		2.2291	0.952879	0.427472	10		12.3183	4.03849		10		12.5952	6.34716		10												Glomus clarum	Glomeraceae	Allium cepa	Forb	Amaryllidaceae	Pathogen	Fusarium oxysporum	Wilt
328	Sikes	2009	International	2.01238	1.27795	0.635042	10		3.15789	1.34991	0.427472	10		12.3183	4.03849		10		12.4567	6.27741		10												Gigaspora giga	Non-Glomeraceae	Allium cepa	Forb	Amaryllidaceae	Pathogen	Fusarium oxysporum	Wilt
329	Sikes	2009	International	2.01238	1.27795	0.635042	10		3.29721	1.40947	0.427472	10		12.3183	4.03849		10		13.564	6.83541		10												Gigaspora margarita	Non-Glomeraceae	Allium cepa	Forb	Amaryllidaceae	Pathogen	Fusarium oxysporum	Wilt
330	Sikes	2009	International	2.01238	1.27795	0.635042	10		3.12693	1.33668	0.427472	10		12.3183	4.03849		10		11.6263	5.85892		10												Scutellospora pell	Non-Glomeraceae	Allium cepa	Forb	Amaryllidaceae	Pathogen	Fusarium oxysporum	Wilt
331	Sikes	2009	International	1.71827	1.09117	0.635042	10		4.08669	1.74695	0.427472	10		30.7266	10.0735		10		9.82699	4.95218		10												Glomus intraradices	Glomeraceae	Setaria glauca	Grass	Poaceae	Pathogen	Fusarium oxysporum	Wilt
332	Sikes	2009	International	1.71827	1.09117	0.635042	10		3.34365	1.42932	0.427472	10		30.7266	10.0735		10		12.7336	6.41691		10												Glomus etunicatum	Non-Glomeraceae	Setaria glauca	Grass	Poaceae	Pathogen	Fusarium oxysporum	Wilt
333	Sikes	2009	International	1.71827	1.09117	0.635042	10		3.51393	1.50211	0.427472	10		30.7266	10.0735		10		9.82699	4.95218		10												Glomus clarum	Glomeraceae	Setaria glauca	Grass	Poaceae	Pathogen	Fusarium oxysporum	Wilt
334	Sikes	2009	International	1.71827	1.09117	0.635042	10		1.71827	0.734511	0.427472	10		30.7266	10.0735		10		33.218	16.7398		10												Gigaspora giga	Non-Glomeraceae	Setaria glauca	Grass	Poaceae	Pathogen	Fusarium oxysporum	Wilt
335	Sikes	2009	International	1.71827	1.09117	0.635042	10		1.39319	0.59555	0.427472	10		30.7266	10.0735		10		36.263	18.2742		10												Gigaspora margarita	Non-Glomeraceae	Setaria glauca	Grass	Poaceae	Pathogen	Fusarium oxysporum	Wilt
336	Sikes	2009	International	1.71827	1.09117	0.635042	10		1.57895	0.674956	0.427472	10		30.7266	10.0735		10		29.2042	14.717		10												Scutellospora pell	Non-Glomeraceae	Setaria glauca	Grass	Poaceae	Pathogen	Fusarium oxysporum	Wilt
337	Singh	2009	International	19.3789	1.98758	0.102564	4	0.993789	27.0807	2.48447	0.0917431	4	1.24224	45.9487	2.15385	0.046875	4	1.07692	25.1282	12.2051	0.485714	4	6.10256											Glomus aggregatum	Glomeraceae	Coleus forskohlii	Forb	Lamiaceae	Pathogen	Fusarium chlamydosporum	Wilt
338	Singh	2009	International	19.3789	1.98758	0.102564	4	0.993789	40	3.47826	0.0869565	4	1.73913	45.9487	2.15385	0.046875	4	1.07692	31.2308	12.9231	0.413793	4	6.46154											Glomus fasiculatum	Glomeraceae	Coleus forskohlii	Forb	Lamiaceae	Pathogen	Fusarium chlamydosporum	Wilt
339	Singh	2009	International	19.3789	1.98758	0.102564	4	0.993789	20.8696	0.993789	0.047619	4	0.496894	45.9487	2.15385	0.046875	4	1.07692	20.1026	2.15385	0.107143	4	1.07692											Glomus intraradices	Glomeraceae	Coleus forskohlii	Forb	Lamiaceae	Pathogen	Fusarium chlamydosporum	Wilt
340	Singh	2009	International	19.3789	1.98758	0.102564	4	0.993789	22.8571	0.993789	0.0434783	4	0.496894	45.9487	2.15385	0.046875	4	1.07692	38.4103	0.717949	0.0186916	4	0.358974											Glomus mosseae	Glomeraceae	Coleus forskohlii	Forb	Lamiaceae	Pathogen	Fusarium chlamydosporum	Wilt
341	Song	2011	International											99.4819	6.28205	0.0631477	3	3.62694	32.6425	3.58974	0.109971	3	2.07254											Glomus mosseae	Glomeraceae	Zea mays	Grass	Poaceae	Pathogen	Rhizoctonia solani	Wilt
342	Srivastava	2010	International	0.12	0.076205	0.635042	3		1.12	0.478769	0.427472	3		92.7	30.3911		3		45.3	22.8283		3												Glomus intraradices	Glomeraceae	Lycopersicon esculentum	Forb	Solanaceae	Pathogen	Fusarium oxysporum f. sp. lycopersici	Wilt
343	Steinkellner	2011	International	11.6942	2.83061	0.242052	8	1.00077	12.6208	3.80036	0.301117	8	1.34363	3.774	2.87085	0.760693	8	1.015	3.04701	2.37305	0.778814	8	0.839001	15.147	7.44725	0.491665	8	2.633	14.683	9.67605	0.658997	8	3.421	Glomus mosseae	Glomeraceae	Lycopersicon esculentum	Forb	Solanaceae	Pathogen	Fusarium oxysporum f. sp. lycopersici	Wilt
344	Subhashini & Padmaja	2010	International	2.2	1.39709	0.635042	3		3.66	1.56455	0.427472	3		100	32.7844		3		63.33	31.9143		3												Glomus mosseae	Glomeraceae	Nicotiana tabacum	Forb	Solanaceae	Pathogen	Pythium aphanidermatum	Wilt
345	Subhashini & Padmaja	2010	International	2.2	1.39709	0.635042	3		4.2	1.79538	0.427472	3		100	32.7844		3		57.33	28.8907		3												Glomus fasiculatum	Glomeraceae	Nicotiana tabacum	Forb	Solanaceae	Pathogen	Pythium aphanidermatum	Wilt
346	Subhashini & Padmaja	2010	International	2.2	1.39709	0.635042	3		4.96	2.12026	0.427472	3		100	32.7844		3		51.66	26.0334		3												Glomus constrictum	Glomeraceae	Nicotiana tabacum	Forb	Solanaceae	Pathogen	Pythium aphanidermatum	Wilt
347	Subhashini & Padmaja	2010	International	2.2	1.39709	0.635042	3		5.78	2.47079	0.427472	3		100	32.7844		3		38.33	19.3159		3												Glomus intraradices	Glomeraceae	Nicotiana tabacum	Forb	Solanaceae	Pathogen	Pythium aphanidermatum	Wilt
348	Subhashini & Padmaja	2010	International	2.2	1.39709	0.635042	3		6.72	2.87261	0.427472	3		100	32.7844		3		31.33	15.7883		3												Glomus sp	Glomeraceae	Nicotiana tabacum	Forb	Solanaceae	Pathogen	Pythium aphanidermatum	Wilt
349	Subhashini & Padmaja	2010	International	2.2	1.39709	0.635042	3		5.4	2.30835	0.427472	3		100	32.7844		3		45	22.6772		3												Acaulospora laevis	Non-Glomeraceae	Nicotiana tabacum	Forb	Solanaceae	Pathogen	Pythium aphanidermatum	Wilt
350	Sukhada	2011	International	41	26.0367	0.635042	12		90	38.4725	0.427472	12		30.8	5.65803	0.183702	12	1.63333	6.06667	4.84974	0.799408	12	1.4											Glomus mosseae	Glomeraceae	Carica papaya	Tree	Caricaceae	Pathogen	Phytophthora parasitica var. nicotianae	Rotting
351	Sukhada	2011	International	138	87.6357	0.635042	12		171	73.0978	0.427472	12		30.8	8.0829	0.262432	12	2.33333	9.1	7.27461	0.799408	12	2.1											Glomus mosseae	Glomeraceae	Carica papaya	Tree	Caricaceae	Pathogen	Phytophthora parasitica var. nicotianae	Rotting
352	Sukhada	2011	International	95	60.329	0.635042	12		155	66.2582	0.427472	12		42.2333	12.1244	0.28708	12	3.5	10.9667	11.3161	1.03186	12	3.26667											Glomus mosseae	Glomeraceae	Carica papaya	Tree	Caricaceae	Pathogen	Phytophthora parasitica var. nicotianae	Rotting
353	Sukhada	2011	International											56.9333	8.0829	0.141971	12	2.33333	17.9667	8.0829	0.449883	12	2.33333											Glomus mosseae	Glomeraceae	Carica papaya	Tree	Caricaceae	Pathogen	Phytophthora parasitica var. nicotianae	Rotting
354	Sukhada	2011	International											57.1667	12.1244	0.212088	12	3.5	17.9667	13.7409	0.764802	12	3.96667											Glomus mosseae	Glomeraceae	Carica papaya	Tree	Caricaceae	Pathogen	Phytophthora parasitica var. nicotianae	Rotting
355	Sukhada	2011	International											63	8.0829	0.1283	12	2.33333	18.2	7.27461	0.399704	12	2.1											Glomus mosseae	Glomeraceae	Carica papaya	Tree	Caricaceae	Pathogen	Phytophthora parasitica var. nicotianae	Rotting
356	Sukhada	2011	International											28.9137	2.76685	0.0956934	12	0.798722	8.94569	2.76685	0.309295	12	0.798722											Glomus mosseae	Glomeraceae	Carica papaya	Tree	Caricaceae	Pathogen	Phytophthora parasitica var. nicotianae	Rotting
357	Sukhada	2011	International											33.3866	4.42697	0.132597	12	1.27796	10.8626	4.42697	0.407541	12	1.27796											Glomus mosseae	Glomeraceae	Carica papaya	Tree	Caricaceae	Pathogen	Phytophthora parasitica var. nicotianae	Rotting
358	Sukhada	2011	International											38.0192	7.19382	0.189216	12	2.07668	10.0639	7.19382	0.714815	12	2.07668											Glomus mosseae	Glomeraceae	Carica papaya	Tree	Caricaceae	Pathogen	Phytophthora parasitica var. nicotianae	Rotting
359	Sukhada	2011	International											36.901	2.76685	0.0749806	12	0.798722	12.9393	2.76685	0.213833	12	0.798722											Glomus mosseae	Glomeraceae	Carica papaya	Tree	Caricaceae	Pathogen	Phytophthora parasitica var. nicotianae	Rotting
360	Sukhada	2011	International											43.131	7.19382	0.16679	12	2.07668	10.7029	7.74719	0.723842	12	2.23642											Glomus mosseae	Glomeraceae	Carica papaya	Tree	Caricaceae	Pathogen	Phytophthora parasitica var. nicotianae	Rotting
361	Sukhada	2011	International											41.853	11.0674	0.264435	12	3.19489	10.8626	10.514	0.967911	12	3.03514											Glomus mosseae	Glomeraceae	Carica papaya	Tree	Caricaceae	Pathogen	Phytophthora parasitica var. nicotianae	Rotting
362	Sundaresan	1993	International	5.87	3.72769	0.635042	3		9.13	3.90282	0.427472	3		34	11.1467		3		14.8	7.45826		3		84	21.9633		3		69	18.7554		3		Glomus fasiculatum	Glomeraceae	Vigna unguiculata	Forb	Fabaceae	Pathogen	Fusarium oxysporum	Wilt
363	Tabin	2009	International	3.5	2.728	0.779429	5	1.22	5.1	1.31928	0.258682	5	0.59											51	28.1297	0.551563	5	12.58	40.8	17.0612	0.418167	5	7.63	Glomus fasciculatum	Glomeraceae	Aquilaria agallocha	Tree	Thymelaeaceae	Pathogen	Pythium aphanidermatum	Wilt
364	Thygesen	2004	International	0.247788	0.0519441	0.209631	5	0.0232301	1.3396	0.207776	0.155103	5	0.0929204	99.5	32.6205		5		61	30.7401		5												Glomus intraradices	Glomeraceae	Pisum sativum	Forb	Fabaceae	Pathogen	Aphanomyces euteiches	Rotting
365	Thygesen	2004	International	0.247788	0.0519441	0.209631	5	0.0232301	0.735619	0.588699	0.800277	5	0.263274	99.5	32.6205		5		75.4	37.9968		5												Glomus claroideum	Non-Glomeraceae	Pisum sativum	Forb	Fabaceae	Pathogen	Aphanomyces euteiches	Rotting
366	Toussaint	2008	International	0.188764	0.0870333	0.461069	15	0.0224719	0.238202	0.15666	0.657676	15	0.0404494	33	10.8188		5		20	10.0787		5		58	15.1651		5		40	10.8727		5		Glomus mosseae	Glomeraceae	Ocimum basilicum	Forb	Lamiaceae	Pathogen	Fusarium oxysporum	Wilt
367	Utkhede	2006	International	80.3	50.9938	0.635042	10		98.3	42.0205	0.427472	10		64.9	21.2771		10		34.4	17.3354		10												Glomus monosporum	Glomeraceae	Lycopersicum esculentum	Forb	Solanaceae	Pathogen	Fusarium oxysporum	Wilt
368	Utkhede	2006	International	80.3	50.9938	0.635042	10		94.2	40.2679	0.427472	10		64.9	21.2771		10		35.7	17.9905		10												Glomus mosseae	Glomeraceae	Lycopersicum esculentum	Forb	Solanaceae	Pathogen	Fusarium oxysporum	Wilt
369	Utkhede	2006	International	80.3	50.9938	0.635042	10		88.6	37.874	0.427472	10		64.9	21.2771		10		56.8	28.6236		10												Glomus vesiculiferum	Glomeraceae	Lycopersicum esculentum	Forb	Solanaceae	Pathogen	Fusarium oxysporum	Wilt
370	Utkhede	2006	International	80.3	50.9938	0.635042	10		90.7	38.7717	0.427472	10		64.9	21.2771		10		54.3	27.3638		10												Glomus deserticola	Glomeraceae	Lycopersicum esculentum	Forb	Solanaceae	Pathogen	Fusarium oxysporum	Wilt
371	Utkhede	2006	International	80.3	50.9938	0.635042	10		82.8	35.3947	0.427472	10		64.9	21.2771		10		57.4	28.926		10												Glomus intraradices	Glomeraceae	Lycopersicum esculentum	Forb	Solanaceae	Pathogen	Fusarium oxysporum	Wilt
372	Hao	2005	International	3.11	1.97498	0.635042	5		3.92	1.67569	0.427472	5		12.5	4.09805		5		0	0		5		37	9.6743		5		32	8.69817		5		Glomus etunicatum	Non-Glomeraceae	Cucumis sativus	Forb	Cucurbitaceae	Pathogen	Fusarium oxysporum	Wilt
373	Vigo	2000	International	5.86	3.72134	0.635042	5		5.25	2.24423	0.427472	5		61	19.9985		5		31	15.622		5												Glomus mosseae	Glomeraceae	Lycopersicon esculentum	Forb	Solanaceae	Pathogen	Phytophthora parasitica	Wilt
374	Watanarojanaporn	2011	International	3.47	0.178885	0.051552	5	0.08	3.1	0.357771	0.11541	5	0.16																					Acaulospora tuberculata	Non-Glomeraceae	Citrus reticulata	Tree	Rutaceae	Pathogen	Phytophthora nicotianae	Rotting
375	Watanarojanaporn	2011	International	3.47	0.178885	0.051552	5	0.08	4.13	0.31305	0.0757989	5	0.14																					Glomus etunicatum	Non-Glomeraceae	Citrus reticulata	Tree	Rutaceae	Pathogen	Phytophthora nicotianae	Rotting
376	Zambolim & Schenck	1983	International	7.5	4.76281	0.635042	10		12.9	5.51439	0.427472	10		20	6.55688		10		18	9.07086		10		37	9.6743		10		24.8	6.74108		10		Glomus mosseae	Glomeraceae	Glycine max	Forb	Fabaceae	Pathogen	Macrophomina phaseolina	Rotting
377	Zambolim & Schenck	1983	International	3.5	2.22265	0.635042	10		4.6	1.96637	0.427472	10		2.8	0.917963		10		2.4	1.20945		10		33	8.62843		10		30.6	8.31763		10		Glomus mosseae	Glomeraceae	Glycine max	Forb	Fabaceae	Pathogen	Rhizictonia solani	Rotting
378	Zambolim & Schenck	1983	International	4	2.54017	0.635042	10		8.1	3.46253	0.427472	10		55	18.0314		10		52	26.2047		10		57	14.9037		10		54	14.6782		10		Glomus mosseae	Glomeraceae	Glycine max	Forb	Fabaceae	Pathogen	Fusarium solani	Rotting
379	Ziedan	2011	International											233	76.3876		6		29.9	15.0677		6												Glomus spp	Glomeraceae	Sesamum indicum	Forb	Pedaliaceae	Pathogen	Fusarium oxysporum	Wilt
380	Ziedan	2011	International											30	9.83532		6		0	0		6												Glomus spp	Glomeraceae	Sesamum indicum	Forb	Pedaliaceae	Pathogen	Marophomina phaseolina	Rotting
381	Gong	2004	International	68.24	43.3352	0.635042	32		94.13	40.238	0.427472	32		42.8	14.0317		32		10.2	5.14016		32												Glomus versiforme	Glomeraceae	Eucayptus sp	Tree	Myrtaceae	Pathogen	Pseudomoru~solanacearum	Wilt
382	Gong	2004	Chinese	68.24	43.3352	0.635042	32		103	44.0296	0.427472	32		42.8	14.0317		32		20.6	10.3811		32												Glomus caledonium	Glomeraceae	Eucayptus sp	Tree	Myrtaceae	Pathogen	Pseudomoru~solanacearum	Wilt
383	Li	2000	Chinese	1.36	0.863657	0.635042	5		1.52	0.649758	0.427472	5		21.8	7.147		5		14.2	7.1559		5												Gigaspora rosea	Non-Glomeraceae	Citrullus lanatus	Forb	Cucurbitaceae	Pathogen	Fusar iumoxy sp orum f. sp.niveum	Wilt
384	Li	2000	Chinese	1.36	0.863657	0.635042	5		1.68	0.718153	0.427472	5		21.8	7.147		5		12.7	6.4		5												Glomus mosseae	Glomeraceae	Citrullus lanatus	Forb	Cucurbitaceae	Pathogen	Fusar iumoxy sp orum f. sp.niveum	Wilt
385	Li	2000	Chinese	1.36	0.863657	0.635042	5		1.68	0.718153	0.427472	5		21.8	7.147		5		8.2	4.13228		5												Glomus versiforme	Glomeraceae	Citrullus lanatus	Forb	Cucurbitaceae	Pathogen	Fusar iumoxy sp orum f. sp.niveum	Wilt
386	Li	2000	Chinese	1.25	0.793802	0.635042	5		1.42	0.607011	0.427472	5		37.3	12.2286		5		25.8	13.0016		5												Gigaspora rosea	Non-Glomeraceae	Citrullus lanatus	Forb	Cucurbitaceae	Pathogen	Fusar iumoxy sp orum f. sp.niveum	Wilt
387	Li	2000	Chinese	1.25	0.793802	0.635042	5		1.53	0.654033	0.427472	5		37.3	12.2286		5		20.5	10.3307		5												Glomus mosseae	Glomeraceae	Citrullus lanatus	Forb	Cucurbitaceae	Pathogen	Fusar iumoxy sp orum f. sp.niveum	Wilt
388	Li	2000	Chinese	1.25	0.793802	0.635042	5		1.6	0.683956	0.427472	5		37.3	12.2286		5		12.7	6.4		5												Glomus versiforme	Glomeraceae	Citrullus lanatus	Forb	Cucurbitaceae	Pathogen	Fusar iumoxy sp orum f. sp.niveum	Wilt
389	Li	2000	Chinese	1.21	0.7684	0.635042	5		1.36	0.581362	0.427472	5		58.5	19.1789		5		31.4	15.8236		5												Gigaspora rosea	Non-Glomeraceae	Citrullus lanatus	Forb	Cucurbitaceae	Pathogen	Fusar iumoxy sp orum f. sp.niveum	Wilt
390	Li	2000	Chinese	1.21	0.7684	0.635042	5		1.45	0.619835	0.427472	5		58.5	19.1789		5		30	15.1181		5												Glomus mosseae	Glomeraceae	Citrullus lanatus	Forb	Cucurbitaceae	Pathogen	Fusar iumoxy sp orum f. sp.niveum	Wilt
391	Li	2000	Chinese	1.21	0.7684	0.635042	5		1.6	0.683956	0.427472	5		58.5	19.1789		5		28.2	14.211		5												Glomus versiforme	Glomeraceae	Citrullus lanatus	Forb	Cucurbitaceae	Pathogen	Fusar iumoxy sp orum f. sp.niveum	Wilt
392	Tang	2000	Chinese											14.7	4.81931		5		1.7	0.856693		5												Glomus mosseae	Glomeraceae	Populus Peinensis Hsu	Tree	Salicaceae	Pathogen	Dothiorella gregaria	Rotting
393	Wang	2005	Chinese	0.397	0.252112	0.635042	3		0.523	0.223568	0.427472	3		15	4.91766		3		0	0		3												Glomus versiforme	Glomeraceae	Cucumis sativus	Forb	Cucurbitaceae	Pathogen	Fusar iumoxy sp orum f. sp.niveum	Wilt
394	Zeng	2011	Chinese											40.6	13.3105		3		20.41	10.2854		3												Glomus aggregatum	Glomeraceae	Nicotiana tabacum	Forb	Solanaceae	Pathogen	Fusar iumoxy sp orum f. sp.niveum	Wilt
395	Zeng	2011	Chinese											40.6	13.3105		3		21.82	10.9959		3												Glomus mosseae	Glomeraceae	Nicotiana tabacum	Forb	Solanaceae	Pathogen	Fusar iumoxy sp orum f. sp.niveum	Wilt
	Notes: Xc: means of control studies; Sc: standard deviations of control studies; Nc: sample number of control studies; SEc: standard error of control studies; CVc: coefficients of variation of control studies
	Xe: means of experimental studies; Se: standard deviations of experimental studies; Ne: sample number of experimental studies; SEe: standard error of experimental studies; CVe: coefficients of variation of experimental studies
